## RESEARCH ARTICLE

# Transcriptome analysis of the plant pathogen *Sclerotinia sclerotiorum* interaction with resistant and susceptible canola (*Brassica napus*) lines

Kishore Chittam <sup>1\*</sup>, William R. Yajima<sup>1</sup>, Rubella S. Goswami<sup>1,2</sup>, Luis E. del Río Mendoza <sup>1\*</sup>

**1** Department of Plant Pathology, North Dakota State University, Fargo, North Dakota, United States of America, **2** USDA-APHIS, Riverdale, Maryland, United States of America

\* [Luis.delRioMendoza@ndsu.edu](mailto:Luis.delRioMendoza@ndsu.edu) (LdR); [Kishore.Chittam@ndsu.edu](mailto:Kishore.Chittam@ndsu.edu) (KC)

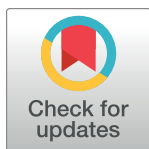

## OPEN ACCESS

**Citation:** Chittam K, Yajima WR, Goswami RS, del Río Mendoza LE (2020) Transcriptome analysis of the plant pathogen *Sclerotinia sclerotiorum* interaction with resistant and susceptible canola (*Brassica napus*) lines. PLoS ONE 15(3): e0229844. <https://doi.org/10.1371/journal.pone.0229844>

**Editor:** Richard A Wilson, University of Nebraska-Lincoln, UNITED STATES

**Received:** December 13, 2019

**Accepted:** February 14, 2020

**Published:** March 11, 2020

**Copyright:** This is an open access article, free of all copyright, and may be freely reproduced, distributed, transmitted, modified, built upon, or otherwise used by anyone for any lawful purpose. The work is made available under the [Creative Commons CC0](https://creativecommons.org/licenses/by/4.0/) public domain dedication.

**Data Availability Statement:** All sequence files are available from the NCBI SRA database under BioProject accession number PRJNA601001. All relevant data are within the manuscript and its Supporting Information files.

**Funding:** National Sclerotinia Initiative USDA-ARS (NACA) award numbers 58-5442-0-243 and 58-3060-5-036 awarded to LdR. <https://www.ars.usda.gov/plains-area/docs/white-mold-research/research/> The funders had no role in study design,

## Abstract

*Sclerotinia* stem rot is an economically important disease of canola (*Brassica napus*) and is caused by the fungal pathogen *Sclerotinia sclerotiorum*. This study evaluated the differential gene expression patterns of *S. sclerotiorum* during disease development on two canola lines differing in susceptibility to this pathogen. Sequencing of the mRNA libraries derived from inoculated petioles and mycelium grown on liquid medium generated approximately 164 million Illumina reads, including 95 million 75-bp-single reads, and 69 million 50-bp-paired end reads. Overall, 36% of the quality filter-passed reads were mapped to the *S. sclerotiorum* reference genome. On the susceptible line, 1301 and 1214 *S. sclerotiorum* genes were differentially expressed at early (8–16 hours post inoculation (hpi)) and late (24–48 hpi) infection stages, respectively, while on the resistant line, 1311 and 1335 genes were differentially expressed at these stages, respectively. Gene ontology (GO) categories associated with cell wall degradation, detoxification of host metabolites, peroxisome related activities like fatty acid  $\beta$ -oxidation, glyoxylate cycle, oxidoreductase activity were significantly enriched in the up-regulated gene sets on both susceptible and resistant lines. Quantitative RT-PCR of six selected DEGs further validated the RNA-seq differential gene expression analysis. The regulation of effector genes involved in host defense suppression or evasion during the early infection stage, and the expression of effectors involved in host cell death in the late stage of infection provide supporting evidence for a two-phase infection model involving a brief biotrophic phase during early stages of infection. The findings from this study emphasize the role of peroxisome related pathways along with cell wall degradation and detoxification of host metabolites as the key mechanisms underlying pathogenesis of *S. sclerotiorum* on *B. napus*.

## Introduction

*Sclerotinia sclerotiorum* (Lib.) de Bary, is a very efficient plant pathogen that affects a wide range of crops and is capable of infecting plant tissues above or below the soil surface. Diseases caused by this pathogen are favored by cool wet conditions [1]. In canola (*Brassica napus* L.),

data collection and analysis, decision to publish, or preparation of the manuscript.

**Competing interests:** The authors have declared that no competing interests exist.

this pathogen is primarily responsible for causing Sclerotinia stem rot (SSR), a yield-reducing disease endemic to canola-producing areas worldwide. Each percent increase in SSR incidence can reduce potential canola yield by 0.5% [2]. Diseases caused by *S. sclerotiorum* are currently controlled by fungicides [3, 4], biological formulations [5, 6], and quantitative genetic disease resistance [7].

Understanding the molecular mechanisms employed by the pathogen during the infection process is essential for identifying novel targets for SSR management. As common with many broad-host range pathogens, the molecular aspects of *S. sclerotiorum* pathogenicity generally studied have concentrated on the roles of hydrolytic cell wall-degrading enzymes (CWDEs) [1, 8, 9]. *S. sclerotiorum* is known to produce several pectinases, including both endo- (*Sspg1*, *Sspg3*, *Sspg5*, and *Sspg6*) and exo- (*Ssxp1* and *Ssxp2*) polygalacturonases [9]. Apart from polygalacturonases, gene disruption mutants of an arabinofuranosidase/ $\beta$ -xylosidase precursor (*Ssaxp*) and an endo- $\beta$ -1, 4-xylanase (*SsXyl1*) showed either reduction or loss of virulence, indicating their importance as virulence factors [10, 11].

Oxalic acid (OA) has by far been the most studied *S. sclerotiorum* virulence factor to date [12, 13]. OA plays multiple roles in virulence of *S. sclerotiorum*, manipulating the host redox environment [13], inducing programmed cell death [14], detoxifying calcium, and mediating pH signaling [15, 16]. OA has long been considered an essential factor for pathogenicity of *S. sclerotiorum*. Recent studies using targeted mutants of the oxaloacetate acetylhydrolase gene (*Ssoah1*), responsible for biogenesis and accumulation of OA, showed that OA is required for virulence, but not essential for pathogenicity on all hosts [17, 18]. The creation of an acidic pH environment during host colonization rather than OA production per se has been suggested to be primary requirement for the colonization stage of pathogenesis [17].

Several studies have reported the role of secreted effector genes in pathogenicity or virulence of this pathogen. A small cysteine rich secreted cyanovirin-N-homology domain protein encoding gene *SsCVNH* [19], and a gene encoding small secreted hypothetical protein *Ssv263* [20] were shown to be essential for full virulence of *S. sclerotiorum*. A compound appressorium formation related gene1 *SsCaf1* [21] and an Rhs repeat-containing protein encoding gene *Ss-Rhs1* [22] were shown to be required for host penetration and initial hyphal infection. Secreted effectors including an integrin-like protein *SsITL* [23], and a chorismate mutase *SsCM1* [24] are known to suppress host resistance by interfering with jasmonic acid/ethylene signaling pathway and salicylic acid signaling pathways, respectively. Other secreted effectors, like the necrosis and ethylene-inducing peptides *SsNep1* and *SsNep2* [25], a small secreted virulence-related protein *SsSSVP1* [26], and the cerato-platanin *SsCP1* [27], are known to induce host cell death and necrosis.

Until recently, most of the reports involving *S. sclerotiorum* and canola, were limited to small scale EST studies [28, 29]; however, availability of the *S. sclerotiorum* genome sequence and the advances in sequencing technologies, particularly RNA-Seq have facilitated the study of global transcriptional changes occurring during pathogenesis [30, 31]. Transcriptome sequencing has been used to study the interaction of *S. sclerotiorum* with various crop hosts [19, 32–34] and recently with *B. napus* [35, 36] and *B. oleracea* [37]. In this study, for the first time we investigated the global transcriptional changes in *S. sclerotiorum* during infection of canola plants differing in their susceptibility to the pathogen.

In contrast to the widely accepted necrotrophic nature of the pathogen [1], a two-phase infection model involving a brief biotrophic or basic compatibility phase characterized by host resistance suppression and subverting of host defenses followed by a necrotrophic phase was proposed based on cytological and molecular and genomic evidences [38–40]. This brief initial phase appears to be partly facilitated by oxalic acid (OA) and by secreted effectors, which help *S. sclerotiorum* evade host recognition and suppress host defense signaling pathways [23, 24,

39]. The role of other effectors in avoiding host recognition and/or suppressing host defense responses is yet to be determined. We initiated this transcriptome sequencing study to gain better understanding of the molecular mechanisms underlying the interaction of *S. sclerotiorum* and canola and it provided insights into the temporal aspects of important mechanisms/pathways employed by *S. sclerotiorum* for successful infection of canola.

## Materials and methods

### Plant material and fungal strain

Two *B. napus* doubled haploid lines differing in their susceptibility to *S. Sclerotiorum* were used in this study. Both lines, NEP32 (susceptible) and NEP63 (resistant) were developed via microspore culture and were evaluated for their reaction to SSR [41]. The susceptible line NEP32 was derived from spring type canola variety Helga (PI649136), and the resistant line NEP63 was developed from a cross between Helga and winter type canola accession PI458940. When inoculated using the petiole inoculation technique [42], the susceptible line develops lesions on the stem that expand to >4 cm in length in length with 100% girdling within 8 days post inoculation, eventually leading to wilting and death. Within the same period, the average lesion size on the resistant line is limited to <1cm in length and <40% stem girdling, typically surrounded by purple margins suggesting accumulation of anthocyanins. The highly aggressive strain 1980 of *S. sclerotiorum* was used for inoculations and culture controls. Strain 1980 was chosen for this study as it is the genome sequenced strain [30, 31].

### Plant growth and inoculation

The seeds of NEP32 and NEP63 were surface sterilized by soaking them in 3% NaOCl for one minute followed by immersion in 70% EtOH for one minute and were rinsed three times in sterilized deionized water for 1 minute. Seeds were planted in SunGro Sunshine mix #1 (Sun Gro Horticulture, MA) in 4 x 10 plastic plots with one seed per pot and plants were grown for 4 weeks in a growth chamber with a 16 h photoperiod, 21° C/16° C day/night temperature, and 60% relative humidity. Once germinated, seedlings were watered as necessary and fertilized once a week with 20-20-20 fertilizer. Four weeks after planting, plants were infected following an established petiole inoculation technique [42]. Briefly, the petiole of one leaf per plant was cut approximately 2.5 cm away from the stem and the stump was capped with PDA plugs containing hyphal tips of an actively growing 2 days-old *S. sclerotiorum* colony using 1 mL pipette tip. Inoculated petioles (≈ 2.5cm) were harvested at 8, 16, 24, and 48 hours post inoculation (hpi), flash frozen in liquid nitrogen and stored at -80° C until RNA extraction. Each treatment—time point consisted of three biological replicates; petioles collected from 5 individual plants were pooled to constitute one biological replicate.

### RNA extraction, library preparation and sequencing

Total RNA was extracted from inoculated petioles using RNeasy mini kit, and mRNA was isolated using Oligotex mRNA mini kit (Qiagen Inc. Valencia, CA) following manufacturers' instructions. cDNA libraries were constructed using NEBNext mRNA sample prep kit and NEBNext Multiplex Oligos kit (New England Biolabs, Ipswich, MA). Similar procedure was followed to construct cDNA libraries from *S. sclerotiorum* mycelia grown on PDB in 10cm petri plates for 48 h under the same conditions described above. For sequencing, RNA from 8 and 16 hpi were pooled and will be referred to as early infection stage (T1) henceforth. Similarly, RNA from 24 and 48 hpi were pooled and are referred to as late infection stage (T2). mRNA libraries were sequenced at the University of Minnesota Biomedical Genomics Center.

Of the three biological replicates, two replicates per each treatment-time point were sequenced on Illumina GA-IIx platform (1X 76 bp Single Reads), while one replicate was sequenced on Illumina HiSeq 2500 platform (2X 50 bp Paired End).

### Quality control and read mapping to the reference genome

Quality checks for the raw fastq files were conducted through a pipeline consisting of FastQC [43] and FastX toolkit ([http://hannonlab.cshl.edu/fastx\\_toolkit/](http://hannonlab.cshl.edu/fastx_toolkit/)) to retain reads that were at least 50 bp long with a minimum quality score of 30. Reference genomes and the corresponding annotations for *S. sclerotiorum* and *B. napus* were downloaded from ensemble fungi (<ftp://ftp.ensemblgenomes.org/pub/release-42/fungi/>) and genoscope (<http://www.genoscope.cns.fr/brassicnapus/data/>), respectively. The most recent full genome sequence of *S. sclerotiorum* (*Sclerotinia sclerotiorum*\_1980\_uf\_70\_gca\_001857865) [31] was used. Indexes for each reference genome were built and quality filter-passed reads were mapped to the reference genomes using HiSat2 [44]. Raw read counts mapped to each gene from the HiSat2 generated alignments were obtained using the featureCounts command [45] of the Subread package [46].

### Differential gene expression analysis

Differential gene expression (DGE) analysis was conducted using edgeR package [47]. The raw count data were normalized with trimmed mean of means (TMM) normalization method implemented in edgeR [48]. Principal component analysis (PCA) was conducted to determine relatedness of the biological replicates. PCA plots were generated using scatterplot3d [49] package in R. Statistical analysis was performed using negative binomial distribution extended to generalized linear models [50]. Pairwise contrasts were performed following quasi-likelihood F tests [51]. A false discovery rate (FDR) cutoff of 0.05 was applied to account for multiple testing correction. A gene was considered as differentially expressed when the change in expression level was  $\geq 2$ -fold (absolute value of  $\log_2$  fold change ( $l_2fc$ )  $\geq 1$ ), with an FDR-adjusted p-value  $< 0.05$ .

### Functional classification and enrichment analyses of DEGs

Gene ontology (GO) enrichment analysis was performed in Blast2GO [52]. GO terms were assigned to *S. sclerotiorum* total genes list in Blast2GO, which were used as the background list for enrichment analysis. Fishers' exact test implemented in Blast2GO was used to identify significantly enriched GO categories. A GO category was considered significantly enriched only when the p-value for that category was  $< 0.05$  after applying FDR correction.

### Differential gene expression data validation

The RNA-seq differential gene expression data was validated by performing qRT-PCR on six selected genes. Primers for qRT-PCR were designed using Primers-Blast [53]. QuantiTect reverse transcription kit (Qiagen Inc. Valencia, CA) was used to synthesize cDNA from total RNA. Real-time quantification was performed using two technical replications in a BioRad CFX96 Real-Time system using iTaq Universal SYBR Green Supermix with the following cycling conditions: 95° C for 30 s followed by 40 cycles of 95° C for 10 s and 60° C for 30 s. Expression levels of the DEGs were normalized against the *S. sclerotiorum* actin gene (*sscle\_14g099090*) and the relative expression levels were calculated using the  $2^{-\Delta\Delta Ct}$  method.

## Results

### Disease development

There were no observable phenotypic differences between the susceptible and resistant canola lines at all sampling time points (Fig 1a). In both lines, necrotic lesions first appeared at point of inoculation (petiole tip) at 16 hpi and gradually spread along the length of the petiole by 48 hpi. Non-inoculated controls never showed necrotic lesion. In the susceptible line, by 72 hpi the lesions extended into stem. In the resistant line, the lesion growth was arrested at the nodes, surrounded by purple margin and did not extend into the stem. The differences in symptoms between the susceptible and resistant canola lines were clearly apparent four days post inoculation (Fig 1b).

### Sequencing and mapping

From the sequencing of *in planta* and *in vitro* cDNA libraries, approximately 164 million reads, comprising 95 million 76-bp-long reads, and 69 million 50-bp-long paired end reads were generated (Table 1). Approximately 87% of the reads from the *in vitro* libraries were mapped to the *S. sclerotiorum* genome. In contrast, 5.4–9.5% of the reads from the *in planta* libraries obtained from samples collected between 8 and 16 hpi, and approximately 38% of

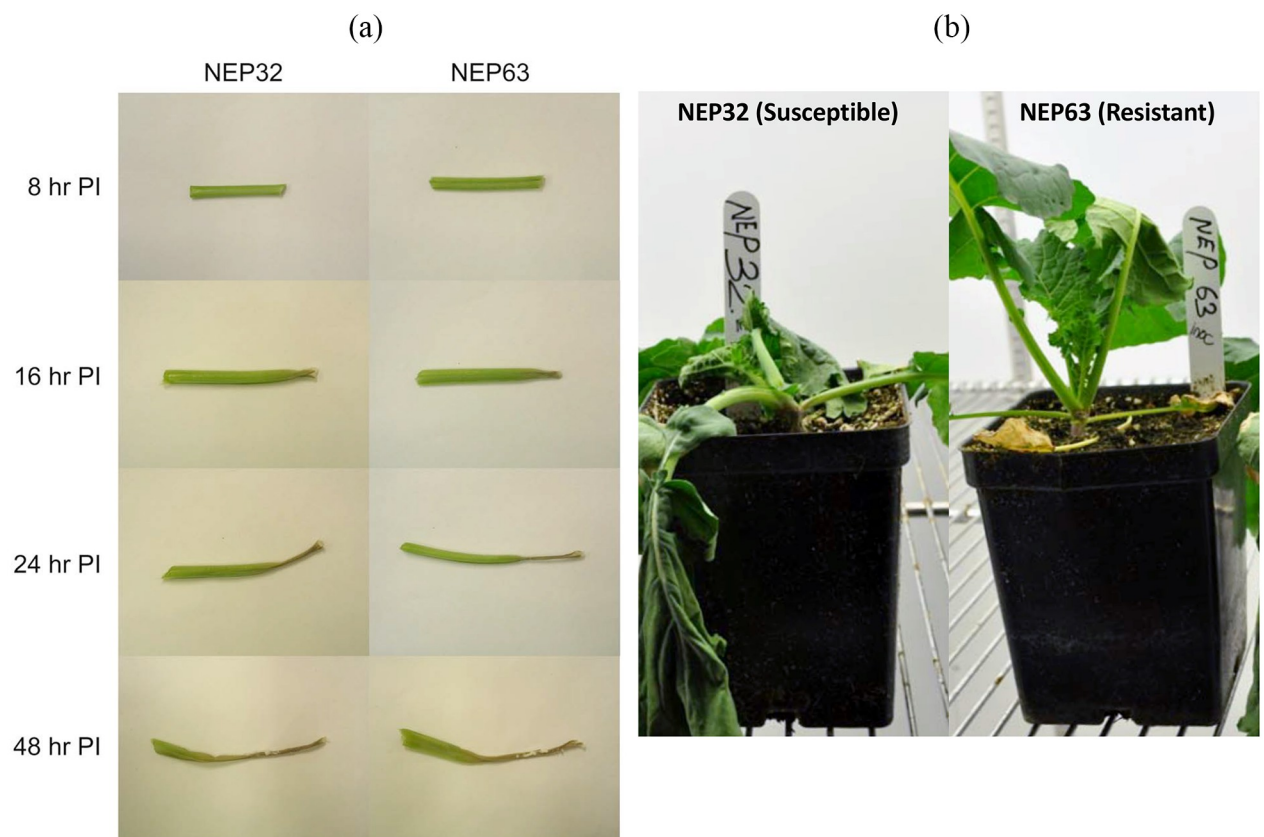

**Fig 1. Disease development on resistant and susceptible canola lines.** (a). Comparison of the appearance of representative inoculated petioles from both canola lines. The necrotic lesion spreads from the point of inoculation (i.e., petiole tip) along the length of the petiole. There are no apparent differences between NEP32 and NEP63 canola petioles. (b). Appearance of resistant (NEP 63) and susceptible (NEP32) canola four days post inoculation with *S. sclerotiorum*. Disease symptoms are more apparent in the susceptible line.

<https://doi.org/10.1371/journal.pone.0229844.g001>

**Table 1. Summary of the Illumina sequence reads obtained from *Brassica napus* plant inoculated with *S. sclerotiorum* and from mycelium of *S. sclerotiorum* isolate 1980 grown on potato dextrose agar.**

|                     | Time points | Total reads <sup>1</sup> | Reads mapped to reference <i>S. sclerotiorum</i> genome (%) |
|---------------------|-------------|--------------------------|-------------------------------------------------------------|
| <i>In Vitro</i>     | Culture     | 41665593                 | 36323396 (87.18)                                            |
| NEP32 (Susceptible) | 8–16 hpi    | 37771674                 | 2021544 (5.35)                                              |
|                     | 24–48 hpi   | 25360044                 | 9642926 (38.02)                                             |
| NEP63 (Resistant)   | 8–6 hpi     | 28670528                 | 2728735 (9.52)                                              |
|                     | 24–48 hpi   | 31040632                 | 11963775 (38.54)                                            |

<sup>1</sup> Number of reads represent total of three biological replications

<https://doi.org/10.1371/journal.pone.0229844.t001>

reads from the libraries obtained from samples collected between 24 and 48 hpi mapped to the reference *S. sclerotiorum* genome. On average, 0.6–1.5% of the reads mapped to *S. sclerotiorum* genome also mapped to *B. napus* genome, and these were excluded from the read counts for differential expression analysis. The percentage of reads from samples collected between 24 and 48 hpi that were mapped to the reference genome was 4 and 8 times larger than that of samples collected earlier for the susceptible and resistant lines, respectively. This difference was somewhat expected as it was apparent from the phenotypic observations that the fungal biomass at earlier stages was smaller compared to that at later stages (Fig 1a). Lower percentage of alignments at earlier phases of infection have also been observed in other pathogen-host interactions [34, 54, 55]. PCA results indicated that the differences in gene expression due to variability between replicates were small (9.15%, PC3, data not shown) compared to sample type (*in vitro* vs. *in planta*, PC1 63.1%) and time of sampling (T1 vs T2, PC2 15.4%) (Fig 2).

### Differential gene expression analysis

DGE analysis was conducted to detect *S. sclerotiorum* transcriptome changes during pathogenesis of canola. A total of 1301 and 1214 *S. sclerotiorum* genes were found to be differentially expressed at early (8–16 hpi) and late (24–48 hpi) stages of infection, respectively, during infection of the susceptible line (S1 File).

Of these, 528 and 773 genes were up- and down- regulated, respectively at T1, while 409 and 805 genes were up- and down- regulated, respectively at T2. When infecting the resistant line, 1311 and 1335 genes were differentially expressed at T1 and T2, respectively (Fig 3, S1 File). In this interaction, 456 and 474 genes were up-regulated, 855 and 861 genes were down-regulated at T1 and T2, respectively. At T1, 317 and 548 genes were common in up-regulated and down-regulated sets, respectively, between the susceptible and resistant interactions (Fig 3a). Similarly, there were 371 up-regulated and 694 down-regulated *S. sclerotiorum* genes that were common in both resistant and susceptible interactions at T2 (Fig 3b). When infecting the susceptible line, 209 up-regulated and 457 down-regulated genes were common between T1 and T2 (Fig 3c). The corresponding numbers when infecting the resistant line were 237 and 493 (Fig 3d). Regulation of an endo-glucanase gene, *sscle\_14g099920*, shifted from significantly down-regulated at T1 to significant up-regulated at T2 in both susceptible and resistant interactions.

The fold-change in gene up-regulation ranged from 2 to 1053 (l2fc 1 to 10.04). In susceptible line, 12 and 8 genes were up-regulated over 100-fold at T1 and T2, respectively. In resistant line, 18 and 9 genes showed a similar 100-fold upregulation at T1 and T2, respectively. On average, approximately 50 genes were up-regulated by 25-fold (l2fc 4.64) or more in both susceptible and resistant lines at both time points. We made a comparison of the 50 most highly up-regulated genes from each of the interactions. Of these highly up-regulated genes, 22 were

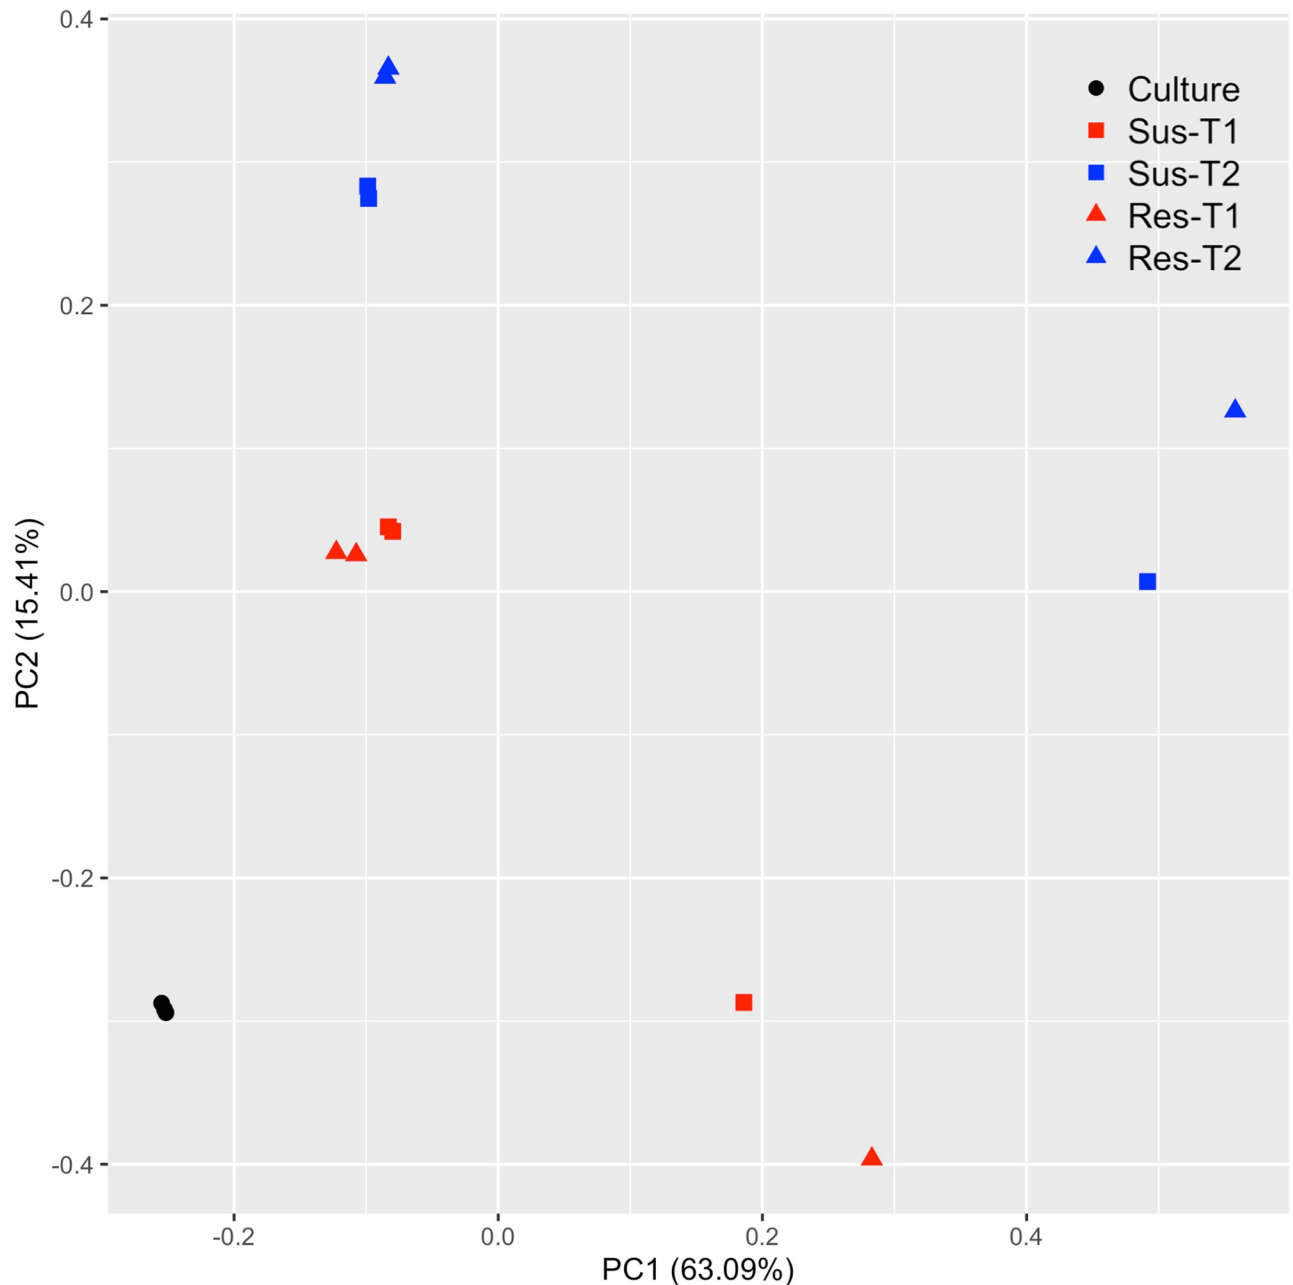

**Fig 2. Principal component analysis of transcriptome expression.** The PCA plot for RNA-Seq data shows the clustering of transcriptome by sample type (culture vs *in planta*) and time of sample collection (T1 vs. T2).

<https://doi.org/10.1371/journal.pone.0229844.g002>

consistently up-regulated by 25-fold (l2fc 4.64) or more at both time points in both canola lines signifying their importance in pathogenesis (Fig 4 and S2 File). Five and 13 genes were common between susceptible and resistant lines at T1 and T2, respectively.

### GO categories and enrichment analysis

Functional characterization and gene functional enrichment analysis are powerful tools for analyzing DGE data to gain understanding of the important molecular pathways and functions

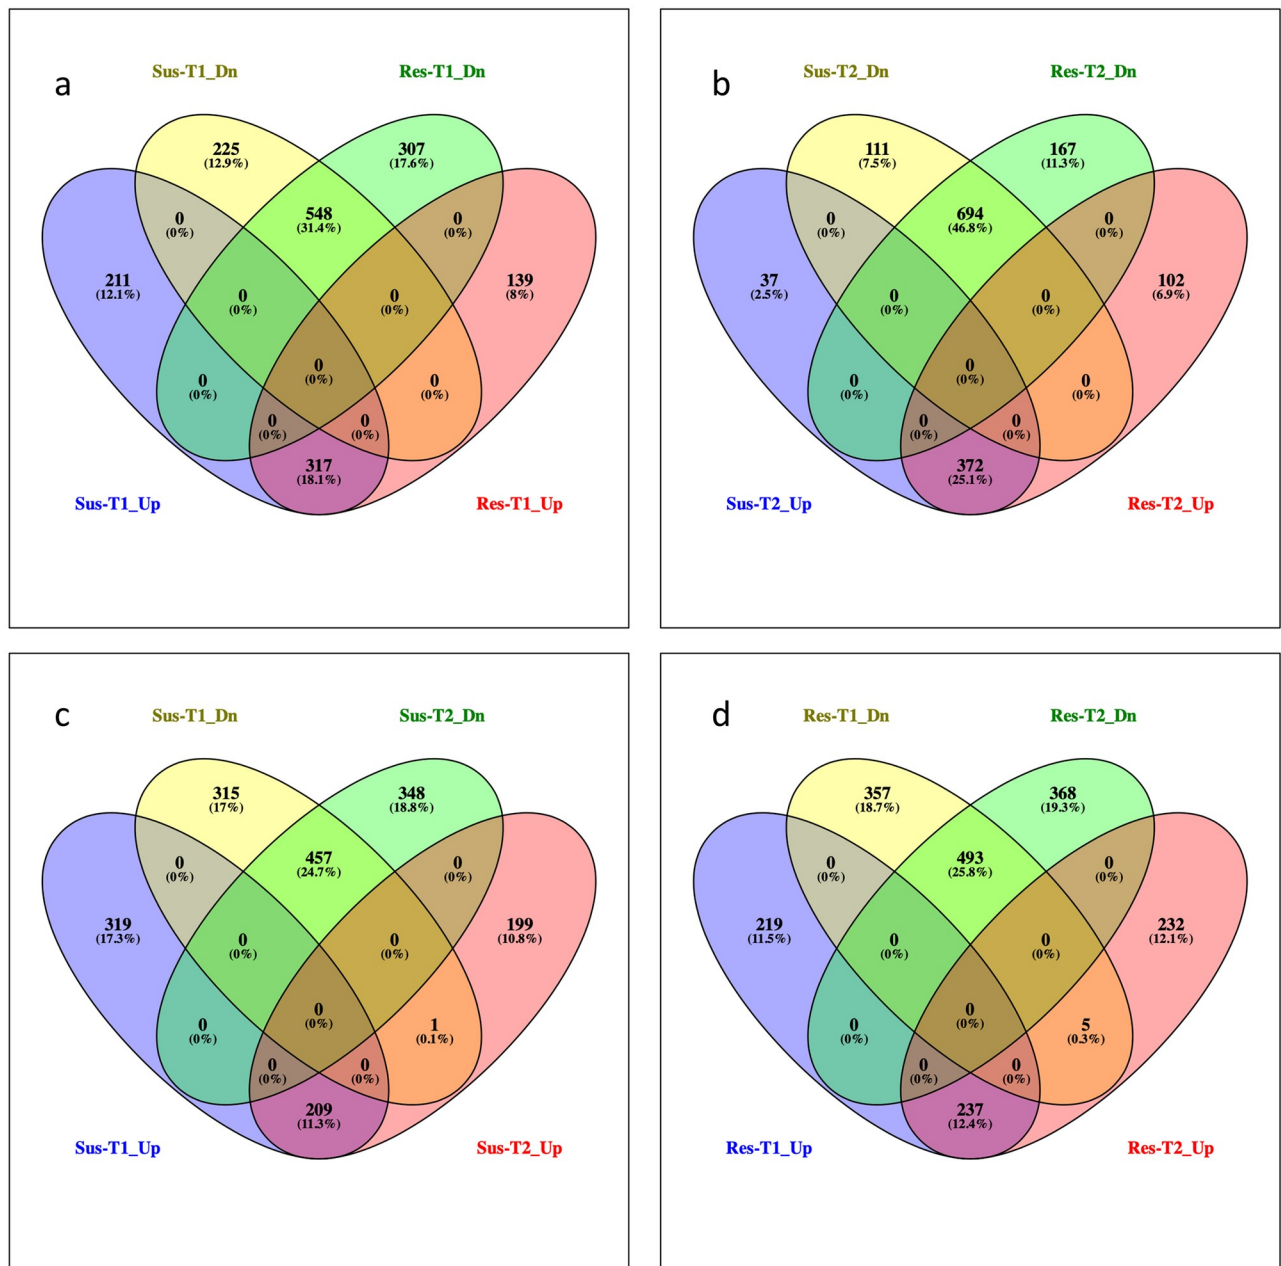

**Fig 3. Venn diagrams showing differentially expressed *Sclerotinia sclerotiorum* genes during interaction with canola.** Venn diagram shows the number of common and unique genes at (a) T1 and (b) T2, between up and down regulated gene sets of NEP32 and NEP63. (c) and (d) shows the comparison of up and down regulated genes at T1 and T2 gene sets of NEP32 and NEP63, respectively.

<https://doi.org/10.1371/journal.pone.0229844.g003>

underlying biological processes. *Sclerotinia sclerotiorum* DEGs were grouped according to their putative roles in biological processes (BP) and molecular functions (MF) as established by the Gene Ontology Consortium (<http://www.geneontology.org/>). *S. sclerotiorum* DEGs were assigned to the following GO classes: metabolic process, cellular process, cellular component organization, localization, biological regulation, response to stimulus, and signaling when interacting with susceptible and resistant lines at both time points.



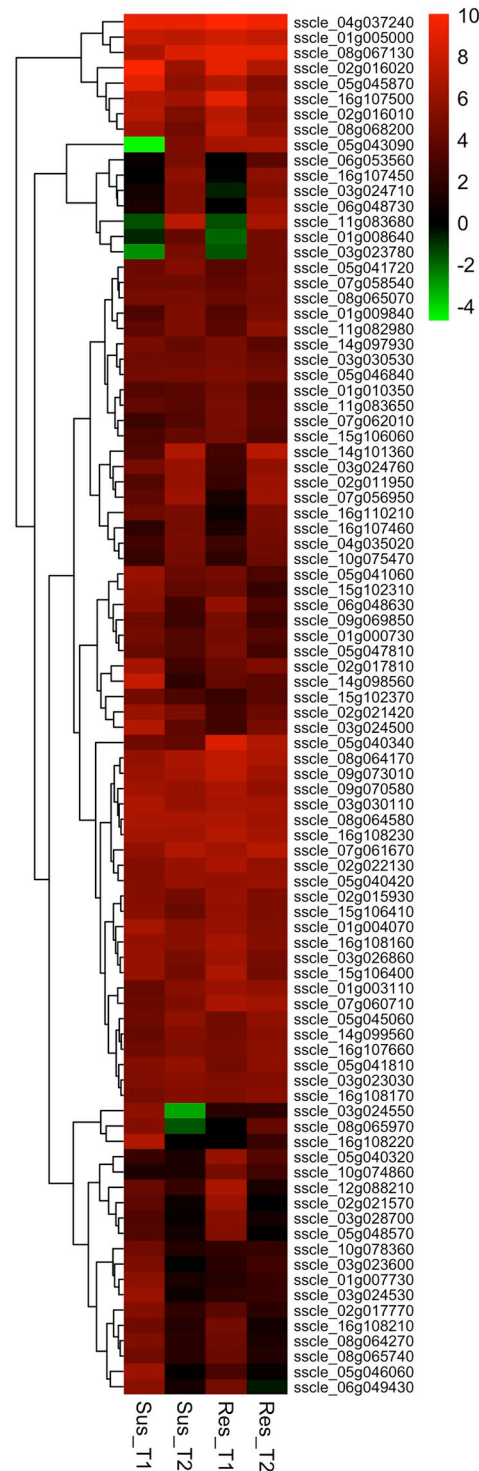

**Fig 4. Heat maps showing expression patterns of the top 50 highly up-regulated *Sclerotinia sclerotiorum* genes from each treatment.** Genes are grouped according to hierarchical clustering based on their expression patterns T1 and T2 represents earlier (8 and 16 hpi) and later (24 and 48 hpi) time points of interaction. The color gradient represents the log<sub>2</sub> fold change in gene expression (up-regulation (red), down-regulation (green), and no change (black)) compared to *in vitro* control.

<https://doi.org/10.1371/journal.pone.0229844.g004>

GO enrichment analysis identified the key biological processes and molecular functions significantly enriched during pathogenesis. The up-regulated genes were significantly enriched with wide range of GO categories (S3 File). The significantly enriched categories included those involved in degradation of various cell wall components (including catabolism of cellulose (GO:0030245), xylan (GO:0045493), mannan (GO:0046355), pectin (GO:0045490)), peptidase activity (GO:0008233), oxidation-reduction processes (GO:0055114), response to xenobiotic stimulus (GO:0009410), fatty acid metabolic processes (GO:0006631), transmembrane transport (GO:0055085), and binding (GO:0005488) activities.

GO enrichment analysis also provided insights into temporal aspects of pathogenesis. Genes involved in transcriptional reprogramming, e.g. gene expression (GO:0006396), ribosome biogenesis (GO:0042254), translation (GO:0006412), and cellular amino acid metabolic processes (GO:0006520) were enriched at the early infection stage, T1, in the up-regulated gene set indicating rapid transcriptional changes to adopt to pathogenic phase from *in vitro* phase. At the later infection stage, T2, many GO categories were overrepresented in the up-regulated set compared to the earlier stage. The significantly enriched up-regulated GO categories at later stage can be broadly grouped into enzymes involved in degradation of cell wall components (cell wall-degrading enzymes CWDE) and proteins, catabolism/detoxification of xenobiotic compounds and peroxisome associated pathways including peroxisome biogenesis, fatty acid catabolism and glyoxylate cycle.

### Differential gene expression data validation

DGE data from RNA-seq analysis was validated by performing quantitative RT-PCR on five up-regulated DEGs and one down-regulated DEG. A list of the genes used for validation, their putative functions, and the primer sequences are presented in S4 File. The expression patterns of the six genes agreed with DGE data, thus validating the results of DGE analysis (Fig 5).

### Discussion

Both functional class enrichment analysis and the expression patterns of the highly up-regulated genes indicated that successful pathogenicity of *S. sclerotiorum* depends on cell wall degradation, detoxification and host defense evasion.

### CWDE and proteolytic enzymes

The importance of cell wall degrading activity was emphasized by the fact that the genes involved in this activity were both among the highly up-regulated and constituted many significantly enriched up-regulated GO categories. Approximately one third (29/90) of the highly up-regulated (top 50 genes up-regulated by 25-fold (l2fc 4.64) or more) *S. sclerotiorum* genes are involved in cell wall degrading enzymatic activities. Similarly, the significantly enriched CWDE GO categories included: hydrolases (GO:0016787) acting on: O-glucosyl bonds (GO:0004553), including cellulase (GO:0008810), glucosidase (GO:0015926), galactosidase (GO:0015925), polygalacturonase (GO:0004650), alpha-L-arabinofuranosidase (GO:0046556), beta-mannosidase (GO:0004567); ester bonds (GO:0016788), including aspartyl esterase (GO:0045330), lipase (GO:0016298), cutinase (GO:0050525), pectinesterase (GO:0030599); peptidase (GO:0008233), including serine-type endopeptidase (GO:0004252), tripeptidyl-peptidase (GO:0008240) and serine-type carboxypeptidase (GO:0004185) activities. The genome of *S. sclerotiorum* has a significantly large repository of both plant cell wall and fungal cell wall active enzymes [19]. Many of these enzymes were up-regulated in the current study (Table 2). Consistent with our findings, previous comparative transcriptome analyses [19, 28–30, 34–36] have reported that a large number of cell wall-degrading enzymes were up-regulated during pathogenesis, while at least

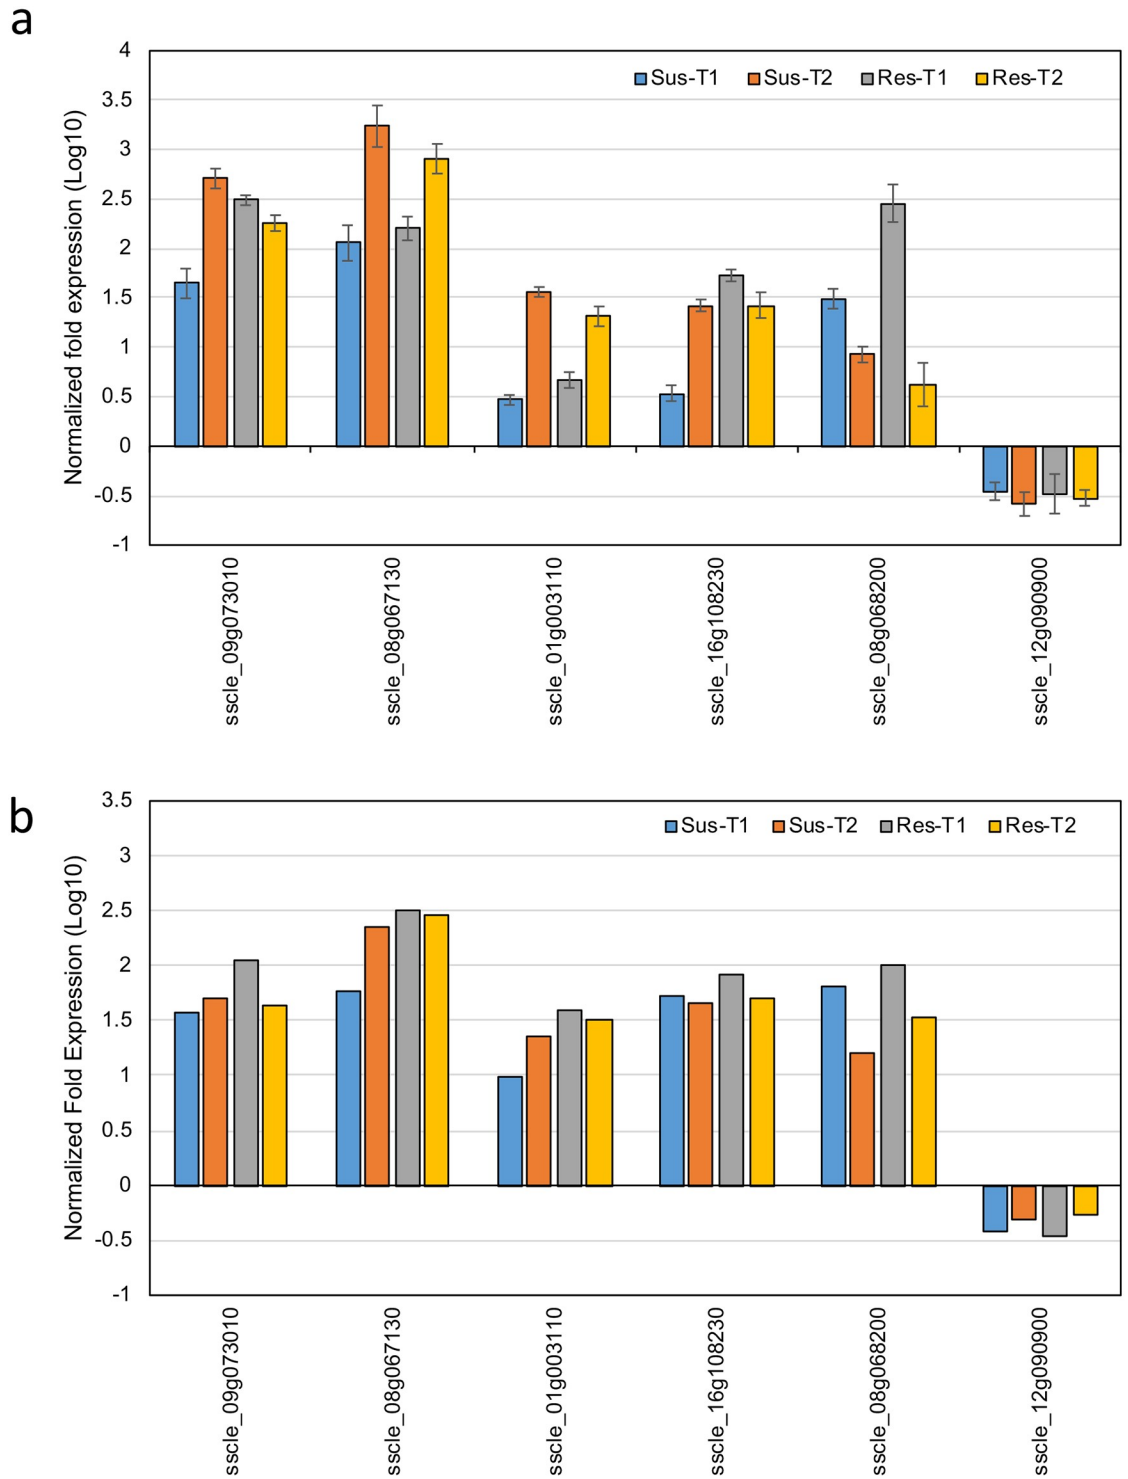

**Fig 5. qRT-PCR validation of the relative expression levels of selected *S. sclerotiorum* differentially expressed genes.** Expression profiles of six *S. sclerotiorum* genes as determined by a. qRT-PCR and b. RNA-Seq.

<https://doi.org/10.1371/journal.pone.0229844.g005>

Table 2. Changes in expression levels of *S. sclerotiorum* genes involved in degradation of plant cell wall components during interaction with susceptible (Sus) and resistant (Res) canola lines at early (T1, 8–16 hpi) and late (T2, 24–48 hpi).

| gene_id         | versionId  | Sus-T1 |       | Sus-T2 |       | Res-T1 |       | Res-T2 |       | Activity  |
|-----------------|------------|--------|-------|--------|-------|--------|-------|--------|-------|-----------|
|                 |            | l2fc   | fdr   | l2fc   | fdr   | l2fc   | fdr   | l2fc   | fdr   |           |
| sscle_10g077670 | SS1G_08493 | 0.89   | 0.788 | -1.05  | 0.196 | -0.87  | 0.366 | -0.96  | 0.223 | Cellulose |
| sscle_03g023660 | SS1G_00891 | 1.66   | 0.383 | 1.67   | 0.402 | 1.73   | 0.373 | 1.23   | 0.556 |           |
| sscle_01g008530 | SS1G_01485 | -0.47  | 0.653 | -1.00  | 0.230 | -2.23  | 0.057 | -1.50  | 0.065 |           |
| sscle_15g105560 | SS1G_09365 | 0.59   | 0.670 | -2.74  | 0.036 | 0.40   | 0.821 | -2.42  | 0.040 |           |
| sscle_07g056950 | SS1G_03387 | 3.84   | 0.145 | 6.23   | 0.032 | 1.12   | 0.816 | 6.22   | 0.030 |           |
| sscle_14g099920 | SS1G_08837 | -3.12  | 0.038 | 2.29   | 0.048 | -3.59  | 0.025 | 2.48   | 0.032 |           |
| sscle_08g063000 | SS1G_04945 | 3.37   | 0.058 | 1.95   | 0.260 | 2.97   | 0.084 | 1.80   | 0.293 |           |
| sscle_01g005720 | SS1G_01828 | 0.52   | 0.571 | 2.16   | 0.008 | 0.92   | 0.269 | 2.50   | 0.003 |           |
| sscle_01g001690 | SS1G_09821 | -5.48  | 0.420 | 1.64   | 0.526 | -5.48  | 0.370 | -1.12  | 0.728 |           |
| sscle_04g039100 | SS1G_03041 | 1.76   | 0.201 | 1.58   | 0.236 | 1.86   | 0.188 | 1.40   | 0.267 |           |
| sscle_03g028060 | SS1G_00321 | 0.37   | 0.882 | 0.41   | 0.812 | -0.80  | 0.715 | 0.84   | 0.571 |           |
| sscle_03g026840 | SS1G_00471 | -1.56  | 0.010 | -1.19  | 0.028 | -1.34  | 0.028 | -1.36  | 0.013 |           |
| sscle_05g045320 | SS1G_06037 | -2.75  | 0.227 | -1.04  | 0.546 | -4.02  | 0.126 | -0.38  | 0.855 |           |
| sscle_04g033820 | SS1G_02334 | 2.78   | 0.007 | 4.24   | 0.000 | 1.88   | 0.049 | 4.30   | 0.000 |           |
| sscle_14g101360 | SS1G_09020 | 3.33   | 0.143 | 6.97   | 0.013 | 2.82   | 0.270 | 7.29   | 0.010 |           |
| sscle_03g023650 | SS1G_00892 | 2.80   | 0.007 | 4.36   | 0.000 | 2.62   | 0.011 | 4.37   | 0.000 |           |
| sscle_14g102070 | SS1G_09118 | 2.08   | 0.386 | -1.19  | 0.573 | -4.65  | 0.251 | -0.77  | 0.711 |           |
| sscle_04g033090 | SS1G_02245 | -3.23  | 0.007 | -3.34  | 0.002 | -4.05  | 0.006 | -3.88  | 0.001 |           |
| sscle_10g080790 | SS1G_13872 | -11.04 | 0.061 | -5.78  | 0.039 | -7.68  | 0.085 | -5.41  | 0.036 |           |
| sscle_04g035060 | SS1G_02501 | -2.53  | 0.017 | -2.15  | 0.023 | -3.92  | 0.004 | -1.90  | 0.035 |           |
| sscle_14g100430 | SS1G_08907 | -1.66  | 0.003 | -2.54  | 0.000 | -1.98  | 0.001 | -2.60  | 0.000 |           |
| sscle_11g082770 | SS1G_07863 | -2.22  | 0.328 | -0.85  | 0.668 | -3.56  | 0.189 | -1.34  | 0.447 |           |
| sscle_08g064580 | SS1G_05151 | 6.75   | 0.002 | 6.66   | 0.001 | 6.89   | 0.002 | 6.41   | 0.002 |           |
| sscle_08g064310 | SS1G_05118 | 0.57   | 0.478 | -0.64  | 0.438 | 0.03   | 0.978 | -1.50  | 0.051 |           |
| sscle_01g007050 | SS1G_01662 | 2.89   | 0.001 | 3.47   | 0.000 | 3.19   | 0.000 | 3.23   | 0.000 |           |
| sscle_15g105550 | SS1G_09366 | 2.72   | 0.000 | 3.96   | 0.000 | 2.10   | 0.001 | 3.76   | 0.000 |           |
| sscle_05g043280 | SS1G_06304 | -4.06  | 0.037 | -0.26  | 0.890 | -3.96  | 0.056 | 0.13   | 0.949 |           |
| sscle_11g082920 | SS1G_07847 | -2.34  | 0.259 | -0.44  | 0.804 | 0.43   | 0.875 | 0.49   | 0.771 |           |
| sscle_06g051500 | SS1G_07146 | 1.56   | 0.653 | 3.24   | 0.222 | -3.14  | 0.487 | 3.07   | 0.236 |           |
| sscle_03g030980 | SS1G_13255 | -3.78  | 0.018 | -1.59  | 0.137 | -2.69  | 0.063 | -2.00  | 0.057 |           |
| sscle_08g066260 | SS1G_05368 | 2.70   | 0.184 | 2.68   | 0.154 | 0.81   | 0.799 | 2.44   | 0.185 |           |
| sscle_06g053450 | SS1G_12622 | -1.19  | 0.239 | 1.34   | 0.163 | -1.41  | 0.208 | 1.62   | 0.085 |           |
| sscle_06g051350 | SS1G_07162 | 2.01   | 0.018 | 1.97   | 0.019 | 1.53   | 0.058 | 1.79   | 0.027 |           |
| sscle_14g102160 | SS1G_09129 | 2.69   | 0.009 | 3.78   | 0.001 | 1.98   | 0.039 | 3.57   | 0.001 |           |
| sscle_02g018140 | SS1G_04264 | 2.30   | 0.007 | 1.69   | 0.029 | 2.15   | 0.009 | 1.72   | 0.025 |           |
| sscle_03g022640 | SS1G_01021 | 2.25   | 0.088 | 3.50   | 0.012 | 1.50   | 0.330 | 3.16   | 0.018 |           |

(Continued)

Table 2. (Continued)

| gene_id         | versionId |            | Sus-T1 |       | Sus-T2 |       | Res-T1 |       | Res-T2 |       | Activity |
|-----------------|-----------|------------|--------|-------|--------|-------|--------|-------|--------|-------|----------|
|                 | l2fc      | fdr        | l2fc   | fdr   | l2fc   | fdr   | l2fc   | fdr   | l2fc   | fdr   |          |
| sscle_1fg108170 |           | SS1G_10167 | 4.78   | 0.018 | 5.31   | 0.011 | 4.99   | 0.015 | 5.40   | 0.010 | Pectin   |
| sscle_09g070580 |           | SS1G_10698 | 6.42   | 0.002 | 5.98   | 0.002 | 6.74   | 0.001 | 5.83   | 0.002 |          |
| sscle_05g046840 |           | SS1G_05832 | 4.62   | 0.006 | 4.76   | 0.005 | 4.98   | 0.004 | 4.60   | 0.005 |          |
| sscle_04g035440 |           | SS1G_02553 | -2.04  | 0.363 | 2.58   | 0.064 | -3.43  | 0.187 | 2.81   | 0.040 |          |
| sscle_02g018610 |           | SS1G_04207 | 0.27   | 0.978 | 6.25   | 0.063 | -4.95  | 0.702 | 6.39   | 0.054 |          |
| sscle_05g040500 |           | SS1G_12057 | 0.41   | 0.762 | 0.31   | 0.953 | -0.74  | 0.612 | 0.36   | 0.783 |          |
| sscle_07g055890 |           | SS1G_03540 | 0.18   | 0.939 | 2.30   | 0.084 | -2.82  | 0.190 | 1.82   | 0.162 |          |
| sscle_1fg107500 |           | SS1G_10071 | 7.06   | 0.002 | 6.39   | 0.003 | 9.02   | 0.001 | 5.80   | 0.005 |          |
| sscle_11g085640 |           | SS1G_14449 | 1.42   | 0.064 | 2.36   | 0.005 | 1.72   | 0.030 | 2.56   | 0.003 |          |
| sscle_02g015930 |           | SS1G_04551 | 5.34   | 0.006 | 4.68   | 0.010 | 6.08   | 0.003 | 5.07   | 0.005 |          |
| sscle_03g027970 |           | SS1G_00332 | 3.67   | 0.002 | 3.75   | 0.001 | 3.46   | 0.003 | 3.56   | 0.002 |          |
| sscle_07g057800 |           | SS1G_03286 | 4.10   | 0.076 | 4.10   | 0.082 | 4.12   | 0.074 | 3.93   | 0.087 |          |
| sscle_03g026860 |           | SS1G_00468 | 6.05   | 0.000 | 4.90   | 0.000 | 6.32   | 0.000 | 4.83   | 0.000 |          |
| sscle_02g019490 |           | SS1G_04095 | -1.26  | 0.187 | 0.18   | 0.892 | -1.06  | 0.280 | 0.67   | 0.507 |          |
| sscle_05g040420 |           | SS1G_12048 | 5.26   | 0.001 | 6.03   | 0.000 | 5.82   | 0.001 | 6.08   | 0.000 |          |
| sscle_12g089930 |           | SS1G_11992 | 3.16   | 0.099 | 4.27   | 0.012 | 4.23   | 0.015 | 4.27   | 0.010 |          |
| sscle_01g002020 |           | SS1G_09857 | -0.86  | 0.836 | 3.77   | 0.046 | -1.30  | 0.725 | 3.98   | 0.033 |          |
| sscle_15g103150 |           | SS1G_13501 | 0.99   | 0.287 | 3.20   | 0.002 | -0.81  | 0.501 | 3.16   | 0.002 |          |
| sscle_02g016000 |           | SS1G_04541 | 0.13   | 0.943 | 0.14   | 0.940 | 0.33   | 0.850 | 0.80   | 0.538 |          |
| sscle_10g075640 |           | SS1G_08229 | -6.87  | 0.013 | -3.25  | 0.082 | -4.81  | 0.036 | -3.00  | 0.099 |          |
| sscle_06g052290 |           | SS1G_07039 | 1.32   | 0.349 | -0.04  | 0.982 | 0.64   | 0.727 | 0.95   | 0.455 |          |
| sscle_02g015920 |           | SS1G_04552 | 3.23   | 0.039 | 1.38   | 0.379 | 3.70   | 0.024 | 1.24   | 0.437 |          |
| sscle_05g041650 |           | SS1G_12191 | 1.27   | 0.370 | 3.85   | 0.016 | 1.05   | 0.483 | 3.97   | 0.012 |          |
| sscle_1fg107660 |           | SS1G_10092 | 4.37   | 0.000 | 5.07   | 0.000 | 4.89   | 0.000 | 5.54   | 0.000 |          |
| sscle_09g074790 |           | SS1G_03618 | -3.94  | 0.675 | 3.29   | 0.256 | -3.94  | 0.619 | 2.28   | 0.460 |          |
| sscle_11g083680 |           | SS1G_07749 | -1.52  | 0.906 | 7.39   | 0.039 | -1.52  | 0.879 | 6.63   | 0.052 |          |
| sscle_08g064500 |           | SS1G_05140 | -1.88  | 0.118 | -1.16  | 0.287 | -2.66  | 0.057 | -1.31  | 0.218 |          |
| sscle_11g080920 |           | SS1G_08104 | 2.29   | 0.076 | 3.93   | 0.004 | 4.20   | 0.004 | 2.84   | 0.019 |          |
| sscle_08g066710 |           | SS1G_05434 | 0.32   | 0.882 | 2.92   | 0.028 | 0.10   | 0.968 | 2.87   | 0.027 |          |
| sscle_03g024710 |           | SS1G_00746 | 0.88   | 0.758 | 5.18   | 0.016 | -0.67  | 0.864 | 5.23   | 0.013 |          |
| sscle_05g045850 |           | SS1G_05977 | 1.15   | 0.451 | 3.90   | 0.008 | 0.49   | 0.832 | 3.82   | 0.007 |          |
| sscle_10g075470 |           | SS1G_08208 | 2.23   | 0.043 | 4.69   | 0.000 | 1.93   | 0.106 | 4.35   | 0.000 |          |
| sscle_10g074850 |           | SS1G_08118 | -1.88  | 0.072 | 0.04   | 0.972 | -3.48  | 0.024 | -0.14  | 0.918 |          |
| sscle_15g105540 |           | SS1G_09367 | -1.11  | 0.248 | 0.75   | 0.458 | -1.80  | 0.101 | 0.57   | 0.588 |          |
| sscle_07g060690 |           | SS1G_11535 | -1.33  | 0.255 | 0.86   | 0.359 | -1.52  | 0.200 | 0.77   | 0.412 |          |
| sscle_02g015110 |           | SS1G_04662 | -3.85  | 0.001 | -2.62  | 0.002 | -6.69  | 0.000 | -2.53  | 0.002 |          |
| sscle_07g056960 |           | SS1G_03386 | 0.22   | 0.935 | 3.28   | 0.019 | -1.86  | 0.428 | 2.95   | 0.028 |          |
| sscle_11g082440 |           | SS1G_07904 | 0.70   | 0.485 | 3.55   | 0.000 | -2.29  | 0.084 | 3.52   | 0.000 |          |
| sscle_04g034810 |           | SS1G_02462 | 2.71   | 0.022 | 4.10   | 0.002 | 1.12   | 0.387 | 4.29   | 0.002 |          |
| sscle_07g055410 |           | SS1G_03602 | 2.13   | 0.085 | 3.65   | 0.006 | 1.76   | 0.161 | 3.50   | 0.007 |          |

(Continued)

Table 2. (Continued)

| gene_id         | versionId  | Sus-T1 |       | Sus-T2 |       | Res-T1 |       | Res-T2 |       | Activity         |
|-----------------|------------|--------|-------|--------|-------|--------|-------|--------|-------|------------------|
|                 |            | l2fc   | fdr   | l2fc   | fdr   | l2fc   | fdr   | l2fc   | fdr   |                  |
| sscle_01g010480 | SS1G_01216 | -5.59  | 0.033 | -3.31  | 0.067 | -11.82 | 0.019 | -3.27  | 0.059 | Arabinogalactans |
| sscle_07g061080 | SS1G_11585 | 0.64   | 0.830 | 3.64   | 0.034 | -0.65  | 0.820 | 4.02   | 0.020 |                  |
| sscle_04g035910 | SS1G_02618 | -2.48  | 0.008 | 0.05   | 0.962 | -4.89  | 0.001 | -0.01  | 0.993 |                  |
| sscle_09g069470 | SS1G_10842 | 3.20   | 0.001 | 3.54   | 0.000 | 1.65   | 0.045 | 3.31   | 0.001 |                  |
| sscle_12g091670 | SS1G_11763 | -1.51  | 0.137 | -0.18  | 0.974 | -2.33  | 0.053 | -0.35  | 0.713 |                  |
| sscle_01g007810 | SS1G_01572 | -0.35  | 0.859 | 1.44   | 0.257 | -3.06  | 0.147 | 1.07   | 0.412 |                  |
| sscle_09g074570 | SS1G_03647 | 1.51   | 0.126 | 2.96   | 0.008 | 0.61   | 0.612 | 2.69   | 0.012 |                  |
| sscle_04g037140 | SS1G_02781 | 1.57   | 0.078 | 1.42   | 0.111 | 1.23   | 0.174 | 1.35   | 0.122 |                  |
| sscle_01g002110 | SS1G_09866 | 0.29   | 0.925 | 2.49   | 0.188 | -2.66  | 0.397 | 2.28   | 0.219 |                  |
| sscle_12g090430 | SS1G_11922 | -5.34  | 0.569 | 3.63   | 0.186 | -5.34  | 0.514 | 3.64   | 0.171 |                  |
| sscle_01g010330 | SS1G_01238 | -0.43  | 0.834 | -2.29  | 0.112 | -0.51  | 0.790 | -2.08  | 0.147 |                  |
| sscle_04g035930 | SS1G_02620 | -1.36  | 0.358 | 0.95   | 0.452 | -4.00  | 0.058 | 0.84   | 0.512 |                  |
| sscle_09g069260 | SS1G_10867 | 0.15   | 0.932 | -1.92  | 0.117 | 1.30   | 0.344 | -1.65  | 0.152 |                  |
| sscle_02g016530 | SS1G_04468 | 1.53   | 0.261 | 3.46   | 0.013 | 1.54   | 0.344 | 3.65   | 0.009 |                  |
| sscle_02g011730 | SS1G_12937 | 0.98   | 0.550 | 0.14   | 0.944 | 0.58   | 0.816 | -0.08  | 0.968 |                  |
| sscle_08g064250 | SS1G_05110 | -3.21  | 0.004 | -2.91  | 0.001 | -3.15  | 0.007 | -2.94  | 0.001 |                  |
| sscle_07g061030 | SS1G_11579 | -0.57  | 0.733 | -0.67  | 0.654 | -0.11  | 0.960 | -1.99  | 0.132 |                  |
| sscle_15g106590 | SS1G_09229 | -2.94  | 0.054 | -0.38  | 0.815 | -5.67  | 0.013 | -0.40  | 0.809 |                  |
| sscle_03g026560 | SS1G_00505 | -3.52  | 0.009 | -3.19  | 0.003 | -2.14  | 0.081 | -2.13  | 0.016 |                  |
| sscle_02g019080 | SS1G_04148 | -1.66  | 0.011 | -0.54  | 0.365 | -2.63  | 0.002 | -0.73  | 0.202 |                  |
| sscle_01g004220 | SS1G_02022 | -3.61  | 0.002 | -1.18  | 0.147 | -4.42  | 0.002 | -1.30  | 0.105 |                  |
| sscle_02g018660 | SS1G_04200 | -0.04  | 0.989 | -2.10  | 0.233 | -4.71  | 0.177 | -0.84  | 0.656 |                  |
| sscle_01g009600 | SS1G_01334 | -2.64  | 0.030 | -1.83  | 0.045 | -2.90  | 0.037 | -1.24  | 0.151 |                  |

<https://doi.org/10.1371/journal.pone.0229844.t002>

one functional study demonstrated that disruption of the cell wall-degrading enzyme arabinofuranosidase/xylosidase (SS1G\_02462) resulted in decreased virulence on canola [10].

## Detoxification of xenobiotic compounds

Genes with known roles in detoxification and host defense evasion constituted the next group of highly up-regulated genes after the CWDEs (Table 3). These include: two laccases (sscle\_03g023030, sscle\_02g021570), nitrilase (sscle\_16g108230), brassinin glycosyltransferase (sscle\_01g003110, SsBGT1), two glutathione-S-transferases (GST), two cytochrome P450 monooxygenases, and three transporter genes, including two major facilitator superfamily transporters, three S-adenosyl methionine (SAM) dependent methyltransferases including a thiol methyltransferase.

Laccases are multicopper oxidase enzymes that are known to detoxify phenolic compounds by oxidizing them [56]. Two of the seven predicted laccase genes in the *S. sclerotiorum* genome were up-regulated. Sscle\_02g021570 (sslacc6) was up-regulated only at T1 (15–70 fold-change, l2fc 3.80–6.15). In contrast, Sslacc2 (sscle\_03g023030) was consistently up-regulated (35–40 fold-change, l2fc 5.13–5.34) at both time points (Table 3). A similar expression pattern was observed in soybean–*S. sclerotiorum* interaction by Westrick et al. [34]. In *B. cinerea*, laccase gene BcLCC2, along with BcAtrB, an ABC transporter, was required for detoxification of the antifungal phenolic antibiotic 2,4-diacetylphloroglucinol [57]. Significantly enriched GO category xenobiotic metabolic processes (GO:0006805) also represented a catechol 1,2-dioxygenase gene, sscle\_04g037100, involved in detoxification of host phenolic compounds. Catechol dioxygenases are induced in response to the phenolics produced by host plants [58]. The catechol dioxygenase gene CCHD1 was induced by maize phenolics [59], and was shown to be a virulence factor in the spruce pathogen *Endoconidiophora polonica* [60].

In addition to phenolic compounds, *Brassica* spp. are known to produce a wide range of phytoalexins, plant secondary metabolites that are elicited by biotic/ abiotic stress [61]; and in response to fungal pathogen attacks [62–64]. Production of phytoalexins has been considered a resistance determinant in some host-pathogen interactions [65]. The metabolism of these strongly antifungal compounds by pathogenic fungi, both *in vitro* and *in planta*, to less toxic compounds has been well researched [61]. Detoxification of cruciferous phytoalexins by *Sclerotinia sclerotiorum* involves glucosylation [66], a mechanism unusual for plant pathogens. Through genome mining and transcriptional profiling, Sexton et al. [67] identified several candidate glucosyltransferases including a brassinin glucosyl transferase (SsBGT1, sscle\_01g003110). Consistent with Sexton et al. [67], the SsBGT1 gene was 17–70 fold up-regulated (l2fc 4.10–6.13) in our study (Table 3). The increased activity of this gene has also been reported by other researchers during infection of canola and soybean [34, 35]. Brassicas also are known to produce phytoanticipins like cyanogenic glucosides and glucosinolates [61, 68] which are produced as part of normal plant metabolism and could have strong antimicrobial properties. Non-toxic glucosinolates, upon cellular injury are hydrolyzed to produce highly toxic isothiocyanates (ITC) and nitriles [68]. In phytopathogenic fungi, nitrilases or cyanide hydratases play a role in detoxifying HCN to the less fungitoxic formamide [69, 70], which some fungi can utilize as a nitrogen source [71, 72]. In our study, the cyanide hydratase gene sscle\_16g108230 was up-regulated by 85–145 folds (l2fc 6.41–7.17) at both time points. Cyanide hydratases/nitrilases, detected in the secretomes of *B. cinerea* [73], were up-regulated during infection of brassica hosts by *A. brassicicola*, *L. maculans* and *S. sclerotiorum* [35, 72, 74]. In *L. maculans*, increase in cyanide hydratase gene expression was induced in the presence of potassium cyanide or derivatives of brassica glucosinolates [72]. In our study, another cyanate hydratase gene, sscle\_07g060330, was up-regulated at late stage only (> 2-fold in susceptible

**Table 3. Changes in expression levels of *S. sclerotiorum* genes involved in detoxification of xenobiotic compounds and peroxisome associated pathways during interaction with susceptible (Sus) and resistant (Res) canola lines at early (T1, 8–16 hpi) and late (T2, 24–48 hpi).**

| gene_id         | version 1 id |       | Sus-T1 |       | Sus-T2 |       | Res-T1 |       | Res-T2 |       | Activity/pathway |
|-----------------|--------------|-------|--------|-------|--------|-------|--------|-------|--------|-------|------------------|
|                 | l2fc         | fdr   | l2fc   | fdr   | l2fc   | fdr   | l2fc   | fdr   | l2fc   | fdr   |                  |
| sscle_01g007350 |              | 1.00  | 0.572  | 0.267 | -1.74  | 0.000 | 0.000  | 0.000 | 0.000  | 0.000 | Laccase          |
| sscle_03g023030 | SS1G_00974   | 5.13  | 0.007  | 0.005 | 5.34   | 0.005 | 0.007  | 0.005 | 0.007  | 0.005 |                  |
| sscle_02g018680 | SS1G_04196   | -1.96 | 0.121  | -4.09 | 0.003  | -2.52 | 0.085  | -4.53 | 0.001  | 0.001 |                  |
| sscle_08g064260 | SS1G_05112   | -1.26 | 0.435  | -3.28 | 0.029  | -5.94 | 0.038  | -3.48 | 0.017  | 0.017 |                  |
| sscle_12g090390 | SS1G_11927   | -3.80 | 0.067  | -4.05 | 0.018  | -2.53 | 0.171  | -3.18 | 0.030  | 0.030 |                  |
| sscle_02g021570 | SS1G_13036   | 3.80  | 0.034  | 0.67  | 0.744  | 6.15  | 0.003  | 0.19  | 0.939  | 0.939 |                  |
| sscle_13g092370 | SS1G_06365   | 0.75  | 0.711  | -1.91 | 0.341  | -1.74 | 0.461  | -0.21 | 0.936  | 0.936 |                  |
| sscle_01g003110 | SS1G_09997   | 4.10  | 0.001  | 5.42  | 0.000  | 6.13  | 0.000  | 5.82  | 0.000  | 0.000 |                  |
| sscle_02g016980 | SS1G_04416   | 0.30  | 0.709  | 1.22  | 0.057  | 1.34  | 0.060  | 1.28  | 0.043  | 0.043 |                  |
| sscle_03g023640 | SS1G_00894   | 0.90  | 0.292  | -0.62 | 0.484  | 0.06  | 0.968  | -0.34 | 0.727  | 0.727 |                  |
| sscle_05g046370 | SS1G_05901   | -1.47 | 0.243  | -1.26 | 0.249  | -3.60 | 0.039  | -1.30 | 0.215  | 0.215 |                  |
| sscle_08g062730 | SS1G_04910   | -0.14 | 0.951  | 0.41  | 0.802  | -0.19 | 0.937  | 0.52  | 0.733  | 0.733 |                  |
| sscle_11g081870 | SS1G_07979   | -0.80 | 0.134  | -0.31 | 0.584  | -1.09 | 0.066  | -0.42 | 0.423  | 0.423 |                  |
| sscle_12g088170 | SS1G_11129   | 0.80  | 0.210  | 0.69  | 0.279  | 0.34  | 0.662  | 0.64  | 0.316  | 0.316 |                  |
| sscle_15g103340 | SS1G_13524   | -3.05 | 0.064  | -4.36 | 0.012  | -4.70 | 0.033  | -4.34 | 0.010  | 0.010 |                  |
| sscle_15g106380 | SS1G_09252   | -2.18 | 0.070  | -2.86 | 0.008  | -2.71 | 0.039  | -2.54 | 0.010  | 0.010 |                  |
| sscle_10g079920 | SS1G_13754   | -4.52 | 0.002  | -0.28 | 0.838  | -4.38 | 0.002  | 0.40  | 0.761  | 0.761 |                  |
| sscle_16g108230 | SS1G_10174   | 6.55  | 0.000  | 6.41  | 0.000  | 7.17  | 0.000  | 6.51  | 0.000  | 0.000 |                  |
| sscle_01g007130 | SS1G_01652   | -3.22 | 0.021  | -0.84 | 0.402  | -3.23 | 0.053  | -1.03 | 0.286  | 0.286 |                  |
| sscle_07g060330 | SS1G_11485   | -0.17 | 0.859  | 1.02  | 0.130  | -0.68 | 0.391  | 0.98  | 0.142  | 0.142 |                  |
| sscle_01g008520 | SS1G_01487   | -2.53 | 0.020  | -2.66 | 0.006  | -5.99 | 0.002  | -3.52 | 0.001  | 0.001 |                  |
| sscle_15g104110 | SS1G_09546   | -1.08 | 0.132  | -0.49 | 0.455  | -1.70 | 0.050  | -0.69 | 0.256  | 0.256 |                  |
| sscle_16g108980 | SS1G_10281   | -0.42 | 0.519  | -0.54 | 0.339  | -1.24 | 0.070  | -0.17 | 0.818  | 0.818 |                  |
| sscle_03g030680 | SS1G_13215   | -0.73 | 0.628  | 0.25  | 0.863  | -0.49 | 0.772  | 0.06  | 0.973  | 0.973 |                  |
| sscle_13g096730 | SS1G_14415   | 0.43  | 0.823  | 0.49  | 0.743  | -1.01 | 0.580  | 0.33  | 0.837  | 0.837 |                  |
| sscle_01g005000 | SS1G_01918   | 7.74  | 0.000  | 7.51  | 0.000  | 8.20  | 0.000  | 7.70  | 0.000  | 0.000 |                  |
| sscle_16g107740 | SS1G_10108   | -3.67 | 0.016  | -4.00 | 0.004  | -3.39 | 0.029  | -4.99 | 0.001  | 0.001 |                  |
| sscle_10g075490 | SS1G_08210   | -1.61 | 0.069  | -0.59 | 0.471  | -2.60 | 0.021  | -0.72 | 0.358  | 0.358 |                  |
| sscle_08g062750 | SS1G_04914   | -0.91 | 0.419  | -0.99 | 0.311  | -1.24 | 0.305  | -1.39 | 0.125  | 0.125 |                  |
| sscle_06g051110 | SS1G_07195   | -0.49 | 0.398  | 0.66  | 0.237  | -0.81 | 0.167  | 0.79  | 0.142  | 0.142 |                  |
| sscle_13g096550 | SS1G_14440   | 0.25  | 0.892  | 0.72  | 0.588  | 1.29  | 0.297  | 1.17  | 0.317  | 0.317 |                  |
| sscle_15g104750 | SS1G_09479   | -0.33 | 0.830  | 0.38  | 0.749  | -0.60 | 0.661  | 0.73  | 0.480  | 0.480 |                  |
| sscle_10g075830 | SS1G_08258   | -0.87 | 0.457  | 0.09  | 0.954  | 1.71  | 0.092  | 0.20  | 0.892  | 0.892 |                  |
| sscle_06g053300 | SS1G_12640   | 1.97  | 0.006  | 2.36  | 0.001  | 1.83  | 0.009  | 2.24  | 0.001  | 0.001 |                  |
| sscle_08g067590 | SS1G_05554   | -1.46 | 0.102  | -0.59 | 0.498  | -1.69 | 0.082  | -0.34 | 0.729  | 0.729 |                  |
| sscle_01g008020 | SS1G_01545   | -2.18 | 0.038  | -1.68 | 0.048  | -1.99 | 0.068  | -1.70 | 0.036  | 0.036 |                  |
| sscle_13g094100 | SS1G_06623   | -0.19 | 0.876  | -0.48 | 0.589  | -0.66 | 0.485  | -0.29 | 0.771  | 0.771 |                  |
| sscle_01g004960 | SS1G_01922   | -0.06 | 0.962  | -0.31 | 0.757  | 0.24  | 0.835  | -0.01 | 0.990  | 0.990 |                  |
| sscle_11g083650 | SS1G_07752   | 3.97  | 0.001  | 3.54  | 0.001  | 4.93  | 0.000  | 3.56  | 0.001  | 0.001 |                  |

(Continued)



Table 3. (Continued)

| gene_id         | version 1 id |       | Sus-T1 |       | Sus-T2 |       | Res-T1 |       | Res-T2                          |     | Activity/pathway |
|-----------------|--------------|-------|--------|-------|--------|-------|--------|-------|---------------------------------|-----|------------------|
|                 | l2fc         | fdr   | l2fc   | fdr   | l2fc   | fdr   | l2fc   | fdr   | l2fc                            | fdr |                  |
| sscle_01g004270 | 1.66         | 0.043 | 0.03   | 0.979 | 0.51   | 0.600 | 0.06   | 0.961 | Chitin Binding or LysM effector |     |                  |
| sscle_02g014090 | -0.48        | 0.735 | -0.70  | 0.534 | -0.70  | 0.604 | -0.30  | 0.822 |                                 |     |                  |
| sscle_03g024480 | 2.35         | 0.012 | 1.53   | 0.067 | 2.35   | 0.015 | 1.11   | 0.174 | nitronate monooxygenase         |     |                  |
| sscle_03g025390 | -3.63        | 0.037 | -3.63  | 0.011 | -2.16  | 0.223 | -4.09  | 0.005 |                                 |     |                  |
| sscle_05g042890 | 3.25         | 0.001 | 2.49   | 0.004 | 2.89   | 0.003 | 2.57   | 0.003 | fatty acid beta-oxidation       |     |                  |
| sscle_06g054140 | -8.68        | 0.010 | -5.19  | 0.003 | -4.41  | 0.030 | -4.31  | 0.005 |                                 |     |                  |
| sscle_06g054180 | -10.20       | 0.032 | -10.20 | 0.009 | -10.20 | 0.033 | -10.20 | 0.007 | oxalic acid                     |     |                  |
| sscle_08g068200 | 6.39         | 0.018 | 4.59   | 0.049 | 7.56   | 0.006 | 5.74   | 0.015 |                                 |     |                  |
| sscle_15g105380 | -3.52        | 0.028 | -1.60  | 0.192 | -4.45  | 0.028 | -1.67  | 0.158 | glyoxylate cycle                |     |                  |
| sscle_15g107050 | -1.39        | 0.605 | -4.37  | 0.071 | -0.52  | 0.902 | -3.87  | 0.072 |                                 |     |                  |
| sscle_07g062010 | 2.54         | 0.020 | 3.40   | 0.002 | 4.87   | 0.000 | 3.59   | 0.001 | Acetyl-CoA acetyl transferase   |     |                  |
| sscle_08g066850 | -2.69        | 0.077 | -2.89  | 0.031 | -3.45  | 0.056 | -2.59  | 0.033 |                                 |     |                  |
| sscle_08g066840 | -2.36        | 0.282 | -1.11  | 0.533 | -7.05  | 0.067 | -2.04  | 0.215 | nitronate monooxygenase         |     |                  |
| sscle_05g041720 | 4.27         | 0.005 | 5.19   | 0.001 | 3.51   | 0.018 | 4.62   | 0.002 |                                 |     |                  |
| sscle_03g027760 | 2.33         | 0.013 | 2.99   | 0.003 | 1.83   | 0.041 | 2.89   | 0.003 | fatty acid beta-oxidation       |     |                  |
| sscle_12g087340 | -1.62        | 0.374 | 1.97   | 0.222 | -3.25  | 0.157 | 2.04   | 0.198 |                                 |     |                  |
| sscle_11g085500 | 1.85         | 0.064 | 2.00   | 0.049 | 1.66   | 0.095 | 2.00   | 0.045 | oxalic acid                     |     |                  |
| sscle_09g069190 | 0.57         | 0.702 | 0.17   | 0.914 | -1.42  | 0.384 | 0.20   | 0.897 |                                 |     |                  |
| sscle_04g038190 | 0.03         | 0.976 | 2.06   | 0.007 | -1.13  | 0.189 | 2.19   | 0.005 | glyoxylate cycle                |     |                  |
| sscle_16g108660 | 4.00         | 0.004 | 3.30   | 0.008 | 3.58   | 0.006 | 3.21   | 0.009 |                                 |     |                  |
| sscle_03g028710 | -0.31        | 0.727 | 1.42   | 0.045 | 0.05   | 0.970 | 1.65   | 0.020 | Acetyl-CoA acetyl transferase   |     |                  |
| sscle_07g059730 | 0.81         | 0.238 | 2.21   | 0.004 | 1.24   | 0.092 | 2.26   | 0.003 |                                 |     |                  |
| sscle_12g090420 | -0.37        | 0.773 | 1.59   | 0.101 | 0.13   | 0.943 | 1.56   | 0.101 | oxalic acid                     |     |                  |
| sscle_09g069100 | -0.38        | 0.793 | 1.35   | 0.231 | -1.93  | 0.198 | 1.36   | 0.217 |                                 |     |                  |
| sscle_10g076540 | 0.62         | 0.573 | 1.61   | 0.098 | -0.38  | 0.785 | 1.97   | 0.042 | glyoxylate cycle                |     |                  |
| sscle_14g099760 | 0.64         | 0.479 | 0.83   | 0.363 | 0.23   | 0.835 | 1.02   | 0.246 |                                 |     |                  |
| sscle_02g018210 | 1.89         | 0.276 | 1.27   | 0.406 | 1.29   | 0.459 | 2.42   | 0.069 | Acetyl-CoA acetyl transferase   |     |                  |
| sscle_05g041330 | -0.16        | 0.925 | -0.53  | 0.690 | 0.29   | 0.840 | -0.54  | 0.690 |                                 |     |                  |
| sscle_11g086520 | 0.69         | 0.554 | 0.48   | 0.707 | 0.32   | 0.820 | 0.41   | 0.764 | oxalic acid                     |     |                  |
| sscle_09g069850 | 4.43         | 0.042 | 2.48   | 0.220 | 4.78   | 0.035 | 2.54   | 0.198 |                                 |     |                  |
| sscle_14g099710 | 0.20         | 0.862 | 0.91   | 0.231 | 1.01   | 0.239 | 1.13   | 0.121 | glyoxylate cycle                |     |                  |
| sscle_10g075560 | 2.18         | 0.010 | 1.87   | 0.020 | 2.04   | 0.013 | 2.12   | 0.010 |                                 |     |                  |
| sscle_08g062640 | 0.29         | 0.601 | 1.20   | 0.017 | 0.40   | 0.476 | 1.35   | 0.008 | Acetyl-CoA acetyl transferase   |     |                  |
| sscle_08g063200 | 3.50         | 0.001 | 4.20   | 0.000 | 3.72   | 0.001 | 4.39   | 0.000 |                                 |     |                  |
| sscle_08g067810 | 1.29         | 0.047 | 2.78   | 0.001 | 2.06   | 0.005 | 2.92   | 0.000 | Acetyl-CoA acetyl transferase   |     |                  |
| sscle_04g038190 | 0.03         | 0.976 | 2.06   | 0.007 | -1.13  | 0.189 | 2.19   | 0.005 |                                 |     |                  |
| sscle_09g069100 | -0.38        | 0.793 | 1.35   | 0.231 | -1.93  | 0.198 | 1.36   | 0.217 | nitronate monooxygenase         |     |                  |
| sscle_10g075460 | 3.01         | 0.001 | 3.07   | 0.001 | 2.47   | 0.003 | 3.13   | 0.000 |                                 |     |                  |
| sscle_05g041330 | -0.16        | 0.925 | -0.53  | 0.690 | 0.29   | 0.840 | -0.54  | 0.690 | nitronate monooxygenase         |     |                  |
| sscle_12g12152  | 0.69         | 0.554 | 0.48   | 0.707 | 0.32   | 0.820 | 0.41   | 0.764 |                                 |     |                  |

<https://doi.org/10.1371/journal.pone.0229844.t003>

(l2fc 1.02),  $\approx$  2-fold (l2fc 0.98) in resistant line). Late activation of this gene was also observed by Seifbarghi et al. [35].

Glutathione-S-transferases (GSTs), are well known for their detoxification activity of xenobiotics and endogenous toxic compounds in fungi by their conjugation to glutathione [75, 76]. A GST gene, *sscle\_01g005000* was highly up-regulated (182–294 fold, l2fc 7.51–8.20) in our study (Table 3). Similarly high levels of up-regulation of this gene were reported during infection of canola [35] and soybean [34]. *Sscl\_11g083650*, another GST, a membrane-associated protein in eicosanoid and glutathione metabolism (MAPEG), was also up-regulated by 12–30-fold (l2fc 3.54–4.93) in our study. Another GST, *sscle\_06g053300* was also consistently upregulated (4–5-fold, l2fc 1.83–2.36) (Table 3). In *A. brassicicola*, an ITC-inducible MAPEG class GST, AbMAPEG1, was required for full virulence on *B. oleracea* [77]. Deletion of two other *A. brassicicola* ITC-inducible GSTs, AbGSOT1 and AbUre2pB1, resulted in both hypersusceptibility to ITC as well as impairment in pathogenicity [77]. These observations emphasize the importance of cyanogenic compound detoxification during pathogenesis.

SAM-dependent methyltransferases catalyze the transfer of methyl groups from SAM to diverse range of substrates [78]. In our study, three SAM-dependent methyltransferases, *sscle\_09g073010* (68–192-fold, l2fc 6.08–7.59), *sscle\_15g106060* (8.5–27-fold, l2fc 3.09–4.74) and *sscle\_08g065070* (19–30-fold, l2fc 4.24–4.92), were highly up-regulated (S2 File). In wood degrading fungus *Phanerochaete chrysosporium*, SAM transferases were involved in detoxifying phenolics [79]. In Brassica and Arabidopsis, thiol methyltransferases are known to detoxify glucosinolates [80].

Lysine motif, LysM, secreted effectors are proteins [81, 82] that contribute to mask the presence of plant pathogenic fungi in plant tissues by binding to chitin on the fungal cell walls [83–85] and interfering in this way with the plant's ability to detect it [86–88]. In our study, two chitin-binding domain protein genes, *sscle\_08g068200* (24–189-fold, l2fc 4.60–7.56) and *sscle\_05g041720* (11–36-fold, l2fc 3.51–5.19) were found to be highly up-regulated. In addition to these two highly up-regulated genes, two other genes with chitin binding domain (*sscle\_01g004270* and *sscle\_07g062010*) and a LysM effector gene (*sscle\_03g024480*) were also up-regulated (Table 3). Regulation of four of these six genes followed a similar pattern, with highest up-regulation at T1 and gradually decreasing at T2. Up-regulation of LysM and chitin binding domain genes also were reported in *S. sclerotiorum* interactions with *B. napus* [35] and *G. max* [34], respectively.

Oxidative burst, characterized by a rapid and transient accumulation of reactive oxygen species (ROS) is one of the first plant defense responses to pathogen invasion [89], creating oxidative stress conditions hostile for the pathogens. Thus, coping with ROS is essential for pathogen survival and successful infection of the host. Fungal pathogens have evolved various mechanisms for tolerating or scavenging ROS, including peroxidases, catalases, superoxide dismutases (sod), and NADPH oxidases (nox). In our study, three peroxidases, *sscle\_01g000730* (10–26-fold, l2fc 3.35–4.73), *sscle\_08g065740* (3–24-fold, l2fc 1.43–4.59), and *sscle\_04g035020* (6–29-fold, l2fc 2.58–4.86) were highly up-regulated (Table 3). Nitronate monooxygenases (NMOs), FMN enzymes are known to play important role in oxidative detoxification of nitroalkanes [90]. Recently, Marroquin-Guzman et al. [91] showed that NMOs are involved in reactive nitrogen species (RNS) stress tolerance and suppressing host immune responses by maintaining cell redox status. In our study, two NMO genes, *sscle\_03g027760* and *sscle\_11g085500*, were consistently up-regulated throughout the course of infection in both susceptible and resistant lines. A third NMO gene, *sscle\_12g087340* was down-regulated at T1 and up-regulated at only T2. There is evidence suggesting a brief biotrophic phase of *S. sclerotiorum* during the infection process and thus we speculate that apart from nitro-oxidative stress protection, *S. sclerotiorum*'s nitronate

monooxygenases might have a similar role in suppressing host defenses during its interaction with canola plants.

*S. sclerotiorum* is known to employ OA for suppressing host defenses by manipulating host-redox environment [13]. OA, by far has been the most studied *S. sclerotiorum* virulence factor to date. In addition to manipulating the host redox environment, OA also plays a key role in virulence by acting in multiple ways: induction of programmed cell death [14], calcium chelating, and mediating pH signaling [15, 16]. We examined the expression of genes involved in OA metabolism. The gene *sscle\_10g075560*, an oxaloacetate acetylhydrolase (OAH, *Ssoah1*) that is a key enzyme responsible for OA biogenesis and accumulation [92], was consistently up-regulated during infection (Table 3). The oxalate decarboxylase (OxDC) gene *sscle\_09g069850* (*Ss-odc2*), was also up-regulated in concert with *Ssoah1*. OxDC genes play an important role by preventing OA from being accumulated in fungal cell and thus protect the pathogen from its detrimental effects [93]. A similar expression pattern for *Ssoah1* and *Ss-odc2* was observed during infection of *B. napus* and *P. vulgaris*, respectively [33, 35], but not on *G. max* [34]. However, another OxDC gene, *Ss-odc1* (*sscle\_14g099710*) was not differentially expressed (1–2 -fold change, l2fc 0.20–1.13). GO terms involved in production of OA precursors and oxidation-reduction process (GO:0055114) were also found to be significantly enriched in the DE gene sets.

### Peroxisome associated pathways

In addition to the above two broad classes, genes associated with peroxisomal pathways were consistently found to be significantly enriched in the up-regulated genes. The important GO categories significantly enriched/overrepresented in this broad group are: peroxisome organization (GO:0007031) including protein targeting (GO:0006625) and protein import (GO:0016558) into peroxisome matrix, fatty acid  $\beta$ -oxidation (GO:0006635) including and glyoxylate cycle (GO:0006097) (S3 File). Peroxisome-related metabolic functions are shown to be essential for pathogenic development of several plant pathogenic fungi [94]. Peroxisome biogenesis proteins, known as peroxins or PEX genes are involved in peroxisome biogenesis. PEX genes have been shown to be essential for pathogenicity/ virulence in the fungal pathogens *M. oryzae* [95–97], *C. orbiculare* [98–100] and *A. alternata* [101]. Up-regulation of large number of PEX genes in our study suggests a possible important role of these genes for *S. sclerotiorum* pathogenicity/ virulence.

Fatty acid  $\beta$ -oxidation is a lipid metabolic pathway for degrading long chain fatty acids for nutrient and energy generation [102, 103]. This is an enzyme mediated, four-step process pathway which results in acetyl-CoA, which can be fed into glyoxylate cycle or transported to mitochondria for energy generation through citric acid cycle. The carnitine acetyl transferase gene *pth2*, an appressorium-associated gene which catalyzes the transportation of acetyl-CoA is required for rice infection by *M. oryzae* [104]. *Ss-pt2*, a *S. sclerotiorum* ortholog of the *pth2* gene was found to be essential for host colonization [105], suggesting an essential role for peroxisomal pathways for host colonization and disease development. This gene (*sscle\_03g031670*) was up-regulated during early and late stages of infection in both susceptible and resistant interactions in this study.

The glyoxylate cycle is important for gluconeogenesis, generation of glucose under nutrient scarce condition by assimilating the Acetyl-CoA generated via fatty acid  $\beta$ -oxidation. Isocitrate lyase (*ICL1*) and Maleate synthetase (*MSL1*) are two important enzymes of glyoxylate cycle [102]. *ICL1* was found to be essential for the pathogenicity of another canola pathogen *L. maculans* [106]; and was shown to be important for full virulence of *M. oryzae* [107] and *C.*

*orbiculare* [108]. *Sclerotinia sclerotiorum* malate synthase gene (*mIs1*) was shown be conditionally essential for fatty acid metabolism and pathogenicity on tomato [109].

### Secreted effectors

Secreted effector proteins play a key role in pathogenesis. Putative effector candidate genes were identified in the *S. sclerotiorum* genome based on bio-informatic analysis [31, 110]. We compared the expression of these *S. sclerotiorum* putative effector genes to determine specific temporal changes in their regulation. In total, 64 putative effector candidates were differentially regulated, of which 37 genes were up-regulated in at least one time point (Fig 6). The majority of these genes were consistently up-regulated in both susceptible and resistant lines at both time points. The up-regulated effector genes were mostly involved in CWDE activity, a non-aspartyl acid protease (*acp1*, *sscle\_11g082980*), Rhs repeat containing protein (*Ss-rhs1*, *sscle\_06g049430*), chorismate mutase (*SsCm1*, *sscle\_16g111080*), and two chitin binding domain proteins (*sscle\_08g068200*, *sscle\_11g082980*). The gene *acp1* is induced in presence of

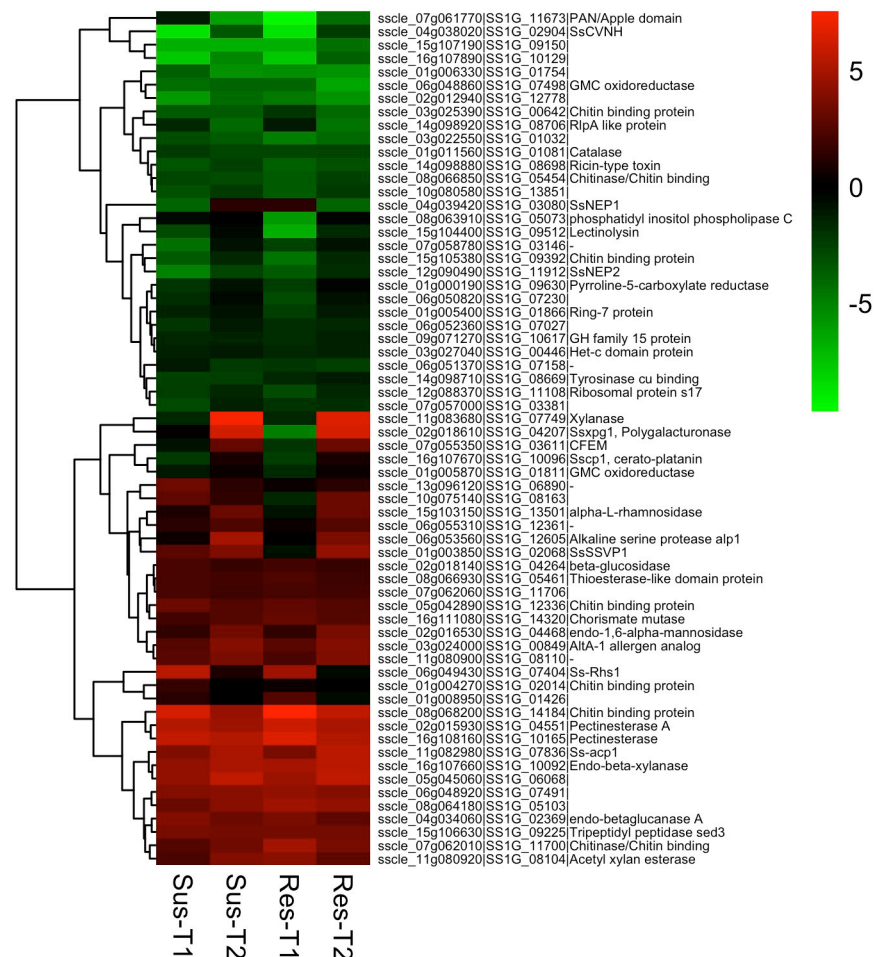

**Fig 6. Heat maps showing expression patterns of *Sclerotinia sclerotiorum* effector genes.** Genes are grouped according to hierarchical clustering based on their expression patterns. T1 and T2 represents earlier (8 and 16 hpi) and later (24 and 48 hpi) time points of interaction. The color gradient represents the log<sub>2</sub> fold change in gene expression (up-regulation (red), down-regulation (green), and no change (black)) compared to *in vitro* control.

<https://doi.org/10.1371/journal.pone.0229844.g006>

cell walls and its expression is regulated by carbon, nitrogen starvation and pH [111]. Up-regulation of this gene increased from 12.5 -fold (l2fc 3.64) at T1 to 48 -fold (l2fc 5.58) at T2. A similar expression pattern was observed in *S. sclerotiorum* interactions with *P. vulgaris*, *B. napus* and *G. max* [33–35]. *Ss-Rhs1* was shown to be important for sclerotial development and initial infection on *B. napus* and Arabidopsis [22]. This gene was highly expressed during initial stages of sclerotial development and hyphal infection [22]. *Ss-Rhs1* was found to be highly up-regulated during the early infection stage (24 hpi) compared to the late infection (48–96 hpi) stage on *G. max* [34], implying a possibly important role during early infection process. Similarly, we also observed 26–48 -fold up-regulation (l2fc 4.72–5.56) of *Ss-Rhs1* only at T1 in both susceptible and resistant lines, respectively. In contrast, the gene *SsCm1* was up-regulated by 4–8.5 -fold (l2fc 2.02–3.08) in our study, which is similar to previous reports of high levels of expression in interactions with *B. napus* [24], and *G. max* [34] during early stages of infection. The biotrophic pathogen *Ustilago maydis* chorismate mutase gene *cmu1*, was shown to decrease SA levels in infected host tissue during infection of *Zea mays*, contributing to the virulence [112]. We speculate that *SsCm1* is likely involved in host manipulation like the *cmu1* in *U. maydis*–*Z. mays* interaction by interfering with SA signaling in *B. napus*. The role of chitin-binding proteins and LysM effectors in avoiding host recognition was discussed earlier. However, a few effector candidates (11) exhibited a shift in their regulation from down-regulation at T1 to up-regulation at T2. Interestingly four of these genes coding for a cerato-platanin (*SsCPI*, sscle\_16g107670), CFEM domain containing (sscle\_07g055350), a small secreted virulence-related protein *SsSSVPI* (sscle\_01g003850, in resistant), and a necrosis and ethylene-inducing peptides *SsNep1* (sscle\_04g039420, in susceptible) are known to function as necrotrophic effectors. Cerato-platanins are fungal specific, small secreted cysteine rich proteins known to function both as elicitors of plant defenses and as well as effectors contributing to virulence [113] by inducing localized necrosis of host tissue. In *S. sclerotiorum*, *SsCPI* was shown to contribute to its virulence by directly interacting with pathogenesis-related protein PR1 [27]. In our study *SsCPI* was down-regulated at T1 by 4.9 -fold (l2fc -2.39) and up-regulated 1.8 -fold (l2fc 0.85) by T2. The CFEM, conserved fungal extracellular membrane proteins domain is a fungal specific domain containing eight conserved cysteine residues [114, 115] and are proposed to have role in fungal pathogenesis. The CFEM protein, *pth11* in *M. oryzae* is essential for appressoria development and pathogenesis [116, 117]. Kou et al. [117] showed that deletion of *pth11* results in disruption of redox homeostasis and thus affects appressorium formation during pathogenesis. In *B. cinerea*, a closely related broad-host-range necrotroph, *BcCFEM1*, a CFEM containing gene, plays a key role in stress resistance and virulence [118]. *BcCFEM1* also has a potential elicitor role. Gene sscle\_07g055350 was 4.4 -fold down-regulated (l2fc -2.13) at T1, followed by 9 -fold upregulation (l2fc 3.18) at T2. A similar expression pattern (up-regulation only at late infection) was observed by Seifbarghi et al [35] and Guyon et al. [110] during infection of canola and soybean [34] by *S. sclerotiorum* and by Thatcher et al. [119] during *Fusarium oxysporum* and *Medicago truncatula* interaction. *SsSSVPI*, another characterized *S. sclerotiorum* virulence factor, is a small cysteine rich secreted protein essential for full virulence. *SsSSVPI* interferes with the host mitochondrial respiratory pathway by interacting with the QCR8 subunit of cytochrome b-c1 complex, resulting in plant cell death [26]. Consistent with our study, expression of *SsSSVPI* was not detected until late infection stage (96 hpi) in *B. napus* [35]. *SsNep1* and *SsNep2* are shown to induce necrosis in host plants [25]. In this study, *SsNep1* was not up-regulated until T2 (2.5 -fold up-regulation, l2fc 1.35), with gradual increase from early infection (15 -fold down-regulation, l2fc -3.89). A similar expression pattern was also observed for *SsNep2* (-33 --3 -fold change (l2fc -5.07 --1.76) from T1 –T2). These two genes were induced mid—late stages of infection in *B. napus* and *G. max* [34, 35].

In contrast to the widely accepted necrotrophic nature of *S. sclerotiorum*, recent molecular and cytological evidences suggest a two-phase model involving a brief biotrophic or basic compatibility phase characterized by host suppression and subverting of host defenses following by necrotrophic phase [38]. The temporal differential expression patterns of the effector candidates in our study supports the two-phase infection model [38–40] proposed for *S. sclerotiorum*. Biotrophic effectors like chorismate mutase (*SsCm1*), chitin binding proteins, LysM, and genes involved in ROS and RNS scavenging are up-regulated at early infection phase. Effectors known to induce necrosis like *SsCp1*, *SsSSVP1*, *SsNep1*, *SsNep2* were either not up-regulated until late infection and/or down-regulated at early stages of infection. A similar trend in expression of necrotrophic effectors was observed by Westrick et al in *S. sclerotiorum*—*G. max* interaction [34]. Two characterized effector genes *SsCVNH* [19] and *SsITL* [23] were significantly down-regulated at both time points, whereas another characterized effector gene, *Ssggt2* (*sscle\_09g068730*), encoding  $\gamma$ -glutamyl transpeptidase was consistently up-regulated (2–3 -fold, l2fc 1.12–1.65) at both time points.

## Conclusions

This is the first study that examine global transcriptional changes in *S. sclerotiorum* during infection of canola plants differing in their susceptibility to the pathogen. The findings from this study emphasize the role of peroxisome related pathways, in addition to the cell wall degradation and detoxification of host metabolites as the key mechanisms underlying pathogenesis of *S. sclerotiorum* on canola. Further, temporal changes in expression pattern of several functional classes of genes, like expression of genes involved in avoiding host recognition or suppressing host defenses at early infection stage (Chitin binding domains, LysM effectors, ROS scavenging) and late onset of expression of necrosis inducing effectors (cerato-platanin, *SsSSVP1*, CFEM domain, *SsNep1* and *SsNep2* genes etc.) provided support for the proposed two-phase infection strategy involving a brief biotrophic phase during early infection. Functional analysis of these genes would provide further insight on the events that lead to disease development and colonization of plant tissues.

## Supporting information

**S1 File. List of differentially expressed *S. sclerotiorum* genes during interaction with susceptible [32] and resistant [63] canola lines at early (T1, 8–16 hpi) and late (T2, 24–48 hpi).**

(XLSX)

**S2 File. Changes in expression levels of the top 50 highly upregulated *S. sclerotiorum* genes during infection of susceptible [32] and resistant [63] canola lines at early (T1, 8–16 hpi) and late (T2, 24–48 hpi).**

(XLSX)

**S3 File. Enrichment analysis of *S. sclerotiorum* up-regulated genes during interaction with susceptible [32] and resistant [63] canola lines at early (T1, 8–16 hpi) and late (T2, 24–48 hpi).**

(XLSX)

**S4 File. List of selected *Sclerotinia sclerotiorum* genes, their putative functions, primers, and sequences used for quantitative RT-PCR.**

(XLSX)

## Author Contributions

**Conceptualization:** Kishore Chittam, Rubella S. Goswami, Luis E. del Río Mendoza.

**Formal analysis:** Kishore Chittam.

**Funding acquisition:** Luis E. del Río Mendoza.

**Investigation:** Kishore Chittam, William R. Yajima.

**Supervision:** Rubella S. Goswami, Luis E. del Río Mendoza.

**Writing – original draft:** Kishore Chittam.

**Writing – review & editing:** Kishore Chittam, William R. Yajima, Rubella S. Goswami, Luis E. del Río Mendoza.

## References

1. Bolton MD, Thomma BPHJ, Nelson BD. *Sclerotinia sclerotiorum* (Lib.) de Bary: biology and molecular traits of a cosmopolitan pathogen. *Molecular Plant Pathology*. 2006; 7(1):1–16. <https://doi.org/10.1111/j.1364-3703.2005.00316.x> PMID: 20507424
2. del Río LE, Bradley CA, Henson RA, Endres GJ, Hanson BK, McKay K, et al. Impact of *Sclerotinia* stem rot on yield of canola. *Plant Disease*. 2007; 91(2):191–4. <https://doi.org/10.1094/PDIS-91-2-0191> PMID: 30781003
3. Bardin SD, Huang HC. Research on biology and control of *Sclerotinia* diseases in Canada. *Canadian Journal of Plant Pathology*. 2001; 23(1):88–98.
4. Morton JG, Hall R. Factors determining the efficacy of chemical control of white mold in white bean. *Canadian Journal of Plant Pathology*. 1989; 11(3):297–302.
5. Jones EE, Whipps JM. Effect of inoculum rates and sources of *Coniothyrium minitans* on control of *Sclerotinia sclerotiorum* disease in glasshouse lettuce. *European Journal of Plant Pathology*. 2002; 108(6):527–38.
6. Reeleder RD. The use of yeasts for biological control of the plant pathogen *Sclerotinia sclerotiorum*. *BioControl*. 2004; 49(5):583–94.
7. Lu G. Engineering *Sclerotinia sclerotiorum* resistance in oilseed crops. *African Journal of Biotechnology*. 2003; 2(12):509–16.
8. Dallal Bashi Z, Rimmer SR, Khachatourians GG, Hegedus DD. Factors governing the regulation of *Sclerotinia sclerotiorum* cutinase A and polygalacturonase 1 during different stages of infection. *Canadian Journal of Microbiology*. 2012; 58(5):605–16. <https://doi.org/10.1139/w2012-031> PMID: 22524557
9. Li R, Rimmer R, Buchwaldt L, Sharpe AG, Séguin-Swartz G, Hegedus DD. Interaction of *Sclerotinia sclerotiorum* with *Brassica napus*: cloning and characterization of endo- and exo-polygalacturonases expressed during saprophytic and parasitic modes. *Fungal Genetics and Biology*. 2004; 41(8):754–65. <https://doi.org/10.1016/j.fgb.2004.03.002> PMID: 15219560
10. Yajima W, Liang Y, Kav NNV. Gene Disruption of an Arabinofuranosidase/ $\beta$ -Xylosidase precursor decreases *Sclerotinia sclerotiorum* virulence on canola tissue. *Molecular Plant-Microbe Interactions*. 2009; 22(7):783–9. <https://doi.org/10.1094/MPMI-22-7-0783> PMID: 19522560
11. Yang Y, Jifen X, Jiao D, Yuheng Y, Chaowei B, Ling Q. Disruption of the gene encoding endo- $\beta$ -1, 4-xylanase affects the growth and virulence of *Sclerotinia sclerotiorum*. *Frontiers in Microbiology*. 2016; 7.
12. Xu L, Li G, Jiang D, Chen W. *Sclerotinia sclerotiorum*: An evaluation of virulence theories. *Annu Rev Phytopathol*. 2018; 56:311–38. <https://doi.org/10.1146/annurev-phyto-080417-050052> PMID: 29958073
13. Williams B, Kabbage M, Kim H-J, Britt R, Dickman MB. Tipping the balance: *Sclerotinia sclerotiorum* secreted oxalic acid suppresses host defenses by manipulating the host redox environment. *PLOS Pathogens*. 2011; 7(6):e1002107. <https://doi.org/10.1371/journal.ppat.1002107> PMID: 21738471
14. Kim KS, Min J-Y, Dickman MB. Oxalic acid is an elicitor of plant programmed cell death during *Sclerotinia sclerotiorum* disease development. *Molecular Plant-Microbe Interactions*. 2008; 21(5):605–12. <https://doi.org/10.1094/MPMI-21-5-0605> PMID: 18393620

15. Rollins JA. The *Sclerotinia sclerotiorum* *pac1* gene is required for sclerotial development and virulence. *Molecular Plant-Microbe Interactions*. 2003; 16(9):785–95. <https://doi.org/10.1094/MPMI.2003.16.9.785> PMID: 12971602
16. Liang X, Liberti D, Li M, Kim Y-T, Hutchens A, Wilson R, et al. Oxaloacetate acetylhydrolase gene mutants of *Sclerotinia sclerotiorum* do not accumulate oxalic acid, but do produce limited lesions on host plants. *Molecular Plant Pathology*. 2015; 16(6):559–71. <https://doi.org/10.1111/mpp.12211> PMID: 25285668
17. Xu L, Xiang M, White D, Chen W. pH dependency of sclerotial development and pathogenicity revealed by using genetically defined oxalate-minus mutants of *Sclerotinia sclerotiorum*. *Environ Microbiol*. 2015; 17(8):2896–909. <https://doi.org/10.1111/1462-2920.12818> PMID: 25720941
18. Li J, Zhang Y, Yu PL, Pan H, Rollins JA. Introduction of large sequence inserts by CRISPR-Cas9 to create pathogenicity mutants in the multinucleate filamentous pathogen *Sclerotinia sclerotiorum*. *MBio*. 2018; 9(3).
19. Lyu X, Shen C, Fu Y, Xie J, Jiang D, Li G, et al. Comparative genomic and transcriptional analyses of the carbohydrate-active enzymes and secretomes of phytopathogenic fungi reveal their significant roles during infection and development. *Scientific Reports*. 2015; 5:15565. <https://doi.org/10.1038/srep15565> PMID: 26531059
20. Liang Y, Yajima W, Davis MR, Kav NNV, Strelkov SE. Disruption of a gene encoding a hypothetical secreted protein from *Sclerotinia sclerotiorum* reduces its virulence on canola (*Brassica napus*). *Canadian Journal of Plant Pathology*. 2013; 35(1):46–55.
21. Xiao X, Xie J, Cheng J, Li G, Yi X, Jiang D, et al. Novel secretory protein Ss-Caf1 of the plant-pathogenic fungus *Sclerotinia sclerotiorum* is required for host penetration and normal sclerotial development. *Mol Plant Microbe Interact*. 2014; 27(1):40–55. <https://doi.org/10.1094/MPMI-05-13-0145-R> PMID: 24299212
22. Yu Y, Xiao J, Zhu W, Yang Y, Mei J, Bi C, et al. Ss-Rhs1, a secretory Rhs repeat-containing protein, is required for the virulence of *Sclerotinia sclerotiorum*. *Mol Plant Pathol*. 2017; 18(8):1052–61. <https://doi.org/10.1111/mpp.12459> PMID: 27392818
23. Zhu W, Wei W, Fu Y, Cheng J, Xie J, Li G, et al. A secretory protein of necrotrophic fungus *Sclerotinia sclerotiorum* that suppresses host resistance. *PLOS ONE*. 2013; 8(1):e53901. <https://doi.org/10.1371/journal.pone.0053901> PMID: 23342034
24. Nováková M, Sašek V, Dobrev PI, Valentová O, Burketová L. Plant hormones in defense response of *Brassica napus* to *Sclerotinia sclerotiorum*—reassessing the role of salicylic acid in the interaction with a necrotroph. *Plant Physiol Biochem*. 2014; 80:308–17. <https://doi.org/10.1016/j.plaphy.2014.04.019> PMID: 24837830
25. Dallal Bashi Z, Hegedus DD, Buchwaldt L, Rimmer SR, Borhan MH. Expression and regulation of *Sclerotinia sclerotiorum* necrosis and ethylene-inducing peptides (NEPs). *Molecular Plant Pathology*. 2010; 11(1):43–53. <https://doi.org/10.1111/j.1364-3703.2009.00571.x> PMID: 20078775
26. Lyu X, Shen C, Fu Y, Xie J, Jiang D, Li G, et al. A small secreted virulence-related protein is essential for the necrotrophic interactions of *Sclerotinia sclerotiorum* with its host plants. *PLoS Pathog*. 2016; 12(2):e1005435. <https://doi.org/10.1371/journal.ppat.1005435> PMID: 26828434
27. Yang G, Tang L, Gong Y, Xie J, Fu Y, Jiang D, et al. A cerato-platanin protein SsCP1 targets plant PR1 and contributes to virulence of *Sclerotinia sclerotiorum*. *New Phytologist*. 2018; 217(2):739–55. <https://doi.org/10.1111/nph.14842> PMID: 29076546
28. Li R, Rimmer R, Buchwaldt L, Sharpe AG, Séguin-Swartz G, Coutu C, et al. Interaction of *Sclerotinia sclerotiorum* with a resistant *Brassica napus* cultivar: expressed sequence tag analysis identifies genes associated with fungal pathogenesis. *Fungal Genetics and Biology*. 2004; 41(8):735–53. <https://doi.org/10.1016/j.fgb.2004.03.001> PMID: 15219559
29. Sexton AC, Cozijnsen AJ, Keniry A, Jewell E, Love CG, Batley J, et al. Comparison of transcription of multiple genes at three developmental stages of the plant pathogen *Sclerotinia sclerotiorum*. *FEMS Microbiology Letters*. 2006; 258(1):150–60. <https://doi.org/10.1111/j.1574-6968.2006.00212.x> PMID: 16630270
30. Amselem J, Cuomo CA, van Kan JAL, Viaud M, Benito EP, Couloux A, et al. Genomic Analysis of the necrotrophic fungal pathogens *Sclerotinia sclerotiorum* and *Botrytis cinerea*. *PLOS Genetics*. 2011; 7(8):e1002230. <https://doi.org/10.1371/journal.pgen.1002230> PMID: 21876677
31. Derbyshire M, Denton-Giles M, Hegedus D, Seifbarghy S, Rollins J, van Kan J, et al. The complete genome sequence of the phytopathogenic fungus *Sclerotinia sclerotiorum* reveals insights into the genome architecture of broad host range pathogens. *Genome Biology and Evolution*. 2017; 9(3):593–618. <https://doi.org/10.1093/gbe/evx030> PMID: 28204478
32. Zhuang X, McPhee KE, Coram TE, Peever TL, Chilvers MI. Rapid transcriptome characterization and parsing of sequences in a non-model host-pathogen interaction; pea-*Sclerotinia sclerotiorum*. *BMC Genomics*. 2012; 13(1):668.



33. Oliveira MB, de Andrade RV, Grossi-de-Sá MF, Petrofeza S. Analysis of genes that are differentially expressed during the *Sclerotinia sclerotiorum*–*Phaseolus vulgaris* interaction. *Frontiers in Microbiology*. 2015; 6:1162. <https://doi.org/10.3389/fmicb.2015.01162> PMID: 26579080
34. Westrick NM, Ranjan A, Jain S, Grau CR, Smith DL, Kabbage M. Gene regulation of *Sclerotinia sclerotiorum* during infection of *Glycine max*: on the road to pathogenesis. *BMC Genomics*. 2019; 20(1):157. <https://doi.org/10.1186/s12864-019-5517-4> PMID: 30808300
35. Seifbarghi S, Borhan MH, Wei Y, Coutu C, Robinson SJ, Hegedus DD. Changes in the *Sclerotinia sclerotiorum* transcriptome during infection of *Brassica napus*. *BMC Genomics*. 2017; 18(1):266. <https://doi.org/10.1186/s12864-017-3642-5> PMID: 28356071
36. Peng Q, Xie Q, Chen F, Zhou X, Zhang W, Zhang J, et al. Transcriptome analysis of *Sclerotinia sclerotiorum* at different infection stages on *Brassica napus*. *Current Microbiology*. 2017; 74(10):1237–45. <https://doi.org/10.1007/s00284-017-1309-8> PMID: 28785831
37. Ding Y, Mei J, Chai Y, Yu Y, Shao C, Wu Q, et al. Simultaneous transcriptome analysis of host and pathogen highlights the interaction between *Brassica oleracea* and *Sclerotinia sclerotiorum*. *Phytopathology*. 2019; 109(4):542. <https://doi.org/10.1094/PHYTO-06-18-0204-R> PMID: 30265202
38. Liang X, Rollins JA. Mechanisms of broad host range necrotrophic pathogenesis in *Sclerotinia sclerotiorum*. *Phytopathology*. 2018; 108(10):1128–40. <https://doi.org/10.1094/PHYTO-06-18-0197-RVW> PMID: 30048598
39. Kabbage M, Williams B, Dickman MB. Cell Death Control: The interplay of apoptosis and autophagy in the pathogenicity of *Sclerotinia sclerotiorum*. *PLOS Pathogens*. 2013; 9(4):e1003287. <https://doi.org/10.1371/journal.ppat.1003287> PMID: 23592997
40. Kabbage M, Yarden O, Dickman MB. Pathogenic attributes of *Sclerotinia sclerotiorum*: Switching from a biotrophic to necrotrophic lifestyle. *Plant Science*. 2015; 233(Supplement C):53–60.
41. Su Y. Double haploid production of canola (*Brassica napus* L.) with improved resistance to *Sclerotinia sclerotiorum* via microspore culture: Thesis (M.S.)—North Dakota State University, 2009.; 2009.
42. Zhao J, Peltier AJ, Meng J, Osborn TC, Grau CR. Evaluation of sclerotinia stem rot resistance in oil-seed *Brassica napus* using a petiole inoculation technique under greenhouse conditions. *Plant Disease*. 2004; 88(9):1033–9. <https://doi.org/10.1094/PDIS.2004.88.9.1033> PMID: 30812218
43. Andrews S. FastQC A quality control tool for high throughput sequence data. <http://www.bioinformaticsbabraham.ac.uk/projects/fastqc/>.
44. Kim D, Langmead B, Salzberg SL. HISAT: A fast spliced aligner with low memory requirements. *Nature methods*. 2015; 12(4):357–60. <https://doi.org/10.1038/nmeth.3317> PMID: 25751142
45. Liao Y, Smyth G, Shi W. featureCounts: An efficient general-purpose program for assigning sequence reads to genomic features. *arXiv.org*. 2013; 30(7).
46. Liao Y, Smyth GK, Shi W. The Subread aligner: fast, accurate and scalable read mapping by seed-and-vote. *Nucleic acids research*. 2013; 41(10):e108–e. <https://doi.org/10.1093/nar/gkt214> PMID: 23558742
47. Robinson MD, McCarthy DJ, Smyth GK. edgeR: a Bioconductor package for differential expression analysis of digital gene expression data. *Bioinformatics*. 2010; 26(1):139–40. <https://doi.org/10.1093/bioinformatics/btp616> PMID: 19910308
48. Robinson MD, Oshlack A. A scaling normalization method for differential expression analysis of RNA-seq data. *Genome biology*. 2010; 11(3):R25–R. <https://doi.org/10.1186/gb-2010-11-3-r25> PMID: 20196867
49. Martin M, Uwe L. Scatterplot3d—an R package for Visualizing Multivariate Data. *Journal of Statistical Software*. 2003; 8(11).
50. McCarthy DJ, Chen Y, Smyth GK. Differential expression analysis of multifactor RNA-Seq experiments with respect to biological variation. *Nucleic acids research*. 2012; 40(10):4288–97. <https://doi.org/10.1093/nar/gks042> PMID: 22287627
51. Lun AT, Chen Y, Smyth GK. It's DE-licious: A recipe for differential expression analyses of rna-seq experiments using quasi-likelihood methods in edgeR. *Methods Mol Biol*. 2016; 1418:391–416. [https://doi.org/10.1007/978-1-4939-3578-9\\_19](https://doi.org/10.1007/978-1-4939-3578-9_19) PMID: 27008025
52. Conesa A, Götz S. Blast2GO: A comprehensive suite for functional analysis in plant genomics. *International Journal of Plant Genomics*. 2008; 2008:12.
53. Ye J, Coulouris G, Zaretskaya I, Cutcutache I, Rozen S, Madden TL. Primer-BLAST: A tool to design target-specific primers for polymerase chain reaction. *BMC Bioinformatics*. 2012; 13(1):134.
54. Kawahara Y, Oono Y, Kanamori H, Matsumoto T, Itoh T, Minami E. Simultaneous RNA-Seq analysis of a mixed transcriptome of rice and blast fungus interaction. *PLOS ONE*. 2012; 7(11):e49423. <https://doi.org/10.1371/journal.pone.0049423> PMID: 23139845

55. Kong W, Chen N, Liu T, Zhu J, Wang J, He X, et al. Large-scale transcriptome analysis of cucumber and *Botrytis cinerea* during Infection. PLOS ONE. 2015; 10(11):e0142221. <https://doi.org/10.1371/journal.pone.0142221> PMID: 26536465
56. Shradha R, Shekher S, Sehgal M, Kamthania A, Kumar A. Laccase: microbial sources, production, purification, and potential biotechnological applications. Enzyme research. 2011; 2011(1):217861-.
57. Schouten A, Maksimova O, Cuesta-Arenas Y, van den Berg G, Raaijmakers JM. Involvement of the ABC transporter BcAtrB and the laccase BcLCC2 in defence of *Botrytis cinerea* against the broad-spectrum antibiotic 2,4-diacetylphloroglucinol. Environ Microbiol. 2008; 10(5):1145–57. <https://doi.org/10.1111/j.1462-2920.2007.01531.x> PMID: 18218030
58. Shalaby S, Horwitz BA. Plant phenolic compounds and oxidative stress: integrated signals in fungal–plant interactions. Current Genetics. 2015; 61(3):347–57. <https://doi.org/10.1007/s00294-014-0458-6> PMID: 25407462
59. Shanmugam V, Ronen M, Shalaby S, Larkov O, Rachamim Y, Hadar R, et al. The fungal pathogen *Cochliobolus heterostrophus* responds to maize phenolics: novel small molecule signals in a plant-fungal interaction. Cellular Microbiology. 2010; 12(10):1421–34. <https://doi.org/10.1111/j.1462-5822.2010.01479.x> PMID: 20438575
60. Wadke N, Kandasamy D, Vogel H, Lah L, Wingfield BD, Paetz C, et al. The bark-beetle-associated fungus, *Endoconidiophora polonica*, utilizes the phenolic defense compounds of its host as a carbon source. Plant Physiology. 2016; 171(2):914. <https://doi.org/10.1104/pp.15.01916> PMID: 27208235
61. Pedras MSC, Yaya EE, Glawischnig E. The phytoalexins from cultivated and wild crucifers: Chemistry and biology. Natural Product Reports. 2011; 28(8):1381–405. <https://doi.org/10.1039/c1np00020a> PMID: 21681321
62. Pedras MSC, Zheng Q-A, Gadagi RS, Rimmer SR. Phytoalexins and polar metabolites from the oil-seeds canola and rapeseed: Differential metabolic responses to the biotroph *Albugo candida* and to abiotic stress. Phytochemistry. 2008; 69(4):894–910. <https://doi.org/10.1016/j.phytochem.2007.10.019> PMID: 18039546
63. Dahiya JS, Rimmer SR. Phytoalexin accumulation in tissues of *Brassica napus* inoculated with *Leptosphaeria maculans*. Phytochemistry. 1988; 27(10):3105–7.
64. Storck M, Sacristán Maria D. The role of phytoalexins in the seedling resistance to *Leptosphaeria maculans* in some crucifers. Zeitschrift für Naturforschung C1995. p. 15.
65. Ferrari S, Plotnikova JM, De Lorenzo G, Ausubel FM. Arabidopsis local resistance to *Botrytis cinerea* involves salicylic acid and camalexin and requires EDS4 and PAD2, but not SID2, EDS5 or PAD4. The Plant Journal. 2003; 35(2):193–205. <https://doi.org/10.1046/j.1365-313x.2003.01794.x> PMID: 12848825
66. Pedras MSC, Hossain M. Metabolism of crucifer phytoalexins in *Sclerotinia sclerotiorum*: detoxification of strongly antifungal compounds involves glucosylation. Organic & Biomolecular Chemistry. 2006; 4(13):2581–90.
67. Sexton AC, Minic Z, Cozijnsen AJ, Pedras MSC, Howlett BJ. Cloning, purification and characterisation of brassinin glucosyltransferase, a phytoalexin-detoxifying enzyme from the plant pathogen *Sclerotinia sclerotiorum*. Fungal Genetics and Biology. 2009; 46(2):201–9. <https://doi.org/10.1016/j.fgb.2008.10.014> PMID: 19041410
68. Osbourn AE. Preformed antimicrobial compounds and plant defense against fungal attack. The Plant Cell. 1996; 8(10):1821. <https://doi.org/10.1105/tpc.8.10.1821> PMID: 12239364
69. Fry WE, Evans PH. Association of formamide hydro-lyase with fungal pathogenicity to cyanogenic plants. Phytopathology. 1977; 67(8):1001–6.
70. Wang P, VanEtten HD. Cloning and properties of a cyanide hydratase gene from the phytopathogenic fungus *Gloeocercospora sorghi*. Biochemical and Biophysical Research Communications. 1992; 187(2):1048–54. [https://doi.org/10.1016/0006-291x\(92\)91303-8](https://doi.org/10.1016/0006-291x(92)91303-8) PMID: 1382413
71. Barclay M, Tett VA, Knowles CJ. Metabolism and enzymology of cyanide/metallo-cyanide biodegradation by *Fusarium solani* under neutral and acidic conditions. Enzyme and Microbial Technology. 1998; 23(5):321–30.
72. Sexton AC, Howlett BJ. Characterisation of a cyanide hydratase gene in the phytopathogenic fungus *Leptosphaeria maculans*. Molecular and General Genetics. 2000; 263(3):463–70. <https://doi.org/10.1007/s004380051190> PMID: 10821180
73. González-Fernández R, Aloría K, Valero-Galván J, Redondo I, Arizmendi JM, Jorrín-Novo JV. Proteomic analysis of mycelium and secretome of different *Botrytis cinerea* wild-type strains. Journal of Proteomics. 2014; 97(Supplement C):195–221.
74. Cramer RA, Lawrence CB. Identification of *Alternaria brassicicola* genes expressed in planta during pathogenesis of *Arabidopsis thaliana*. Fungal Genetics and Biology. 2004; 41(2):115–28. <https://doi.org/10.1016/j.fgb.2003.10.009> PMID: 14732258

75. Morel M, Ngadin AA, Droux M, Jacquot JP, Gelhaye E. The fungal glutathione S-transferase system. Evidence of new classes in the wood-degrading basidiomycete *Phanerochaete chrysosporium*. *Cell Mol Life Sci*. 2009; 66(23):3711–25. <https://doi.org/10.1007/s00018-009-0104-5> PMID: 19662500
76. Gullner G, Komives T, Király L, Schröder P. Glutathione S-Transferase enzymes in plant-pathogen interactions. *Front Plant Sci*. 2018; 9:1836. <https://doi.org/10.3389/fpls.2018.01836> PMID: 30622544
77. Calmes B, Morel-Rouhier M, Bataillé-Simoneau N, Gelhaye E, Guillemette T, Simoneau P. Characterization of glutathione transferases involved in the pathogenicity of *Alternaria brassicicola*. *BMC Microbiol*. 2015; 15:123. <https://doi.org/10.1186/s12866-015-0462-0> PMID: 26081847
78. Struck AW, Thompson ML, Wong LS, Micklefield J. S-adenosyl-methionine-dependent methyltransferases: highly versatile enzymes in biocatalysis, biosynthesis and other biotechnological applications. *Chembiochem*. 2012; 13(18):2642–55. <https://doi.org/10.1002/cbic.201200556> PMID: 23180741
79. Jeffers M, McRoberts W, Harper D. Identification of a phenolic 3-O-methyltransferase in the lignin-degrading fungus *Phanerochaete chrysosporium*. *Microbiology*. 1997; 143(6):1975–81.
80. Attieh J, Kleppinger-Sparace K, Nunes C, Sparace S, Saini H. Evidence implicating a novel thiol methyltransferase in the detoxification of glucosinolate hydrolysis products in *Brassica oleracea* L. *Plant, Cell and Environment*. 2000; 23(2):165.
81. de Jonge R, Thomma BPHJ. Fungal LysM effectors: extinguishers of host immunity? *Trends in Microbiology*. 2009; 17(4):151–7. <https://doi.org/10.1016/j.tim.2009.01.002> PMID: 19299132
82. Kombrink A, Thomma BPHJ. LysM effectors: secreted proteins supporting fungal life. *PLOS Pathogens*. 2013; 9(12):e1003769. <https://doi.org/10.1371/journal.ppat.1003769> PMID: 24348247
83. Takahara H, Hacquard S, Kombrink A, Hughes HB, Halder V, Robin GP, et al. *Colletotrichum higginsianum* extracellular LysM proteins play dual roles in appressorial function and suppression of chitin-triggered plant immunity. *New Phytologist*. 2016; 211(4):1323–37. <https://doi.org/10.1111/nph.13994> PMID: 27174033
84. de Jonge R, Peter van Esse H, Kombrink A, Shinya T, Desaki Y, Bours R, et al. Conserved Fungal LysM Effector Ecp6 Prevents Chitin-Triggered Immunity in Plants. *Science*. 2010; 329(5994):953. <https://doi.org/10.1126/science.1190859> PMID: 20724636
85. Mentlak TA, Kombrink A, Shinya T, Ryder LS, Otomo I, Saitoh H, et al. Effector-mediated suppression of chitin-triggered immunity by *Magnaporthe oryzae* is necessary for rice blast disease. *The Plant Cell*. 2012; 24(1):322. <https://doi.org/10.1105/tpc.111.092957> PMID: 22267486
86. Shibuya N, Minami E. Oligosaccharide signalling for defence responses in plant. *Physiological and Molecular Plant Pathology*. 2001; 59(5):223–33.
87. Kaku H, Nishizawa Y, Ishii-Minami N, Akimoto-Tomiyama C, Dohmae N, Takio K, et al. Plant cells recognize chitin fragments for defense signaling through a plasma membrane receptor. *Proc Natl Acad Sci U S A*. 2006; 103(29):11086–91. <https://doi.org/10.1073/pnas.0508882103> PMID: 16829581
88. Fesel PH, Zuccaro A.  $\beta$ -glucan: Crucial component of the fungal cell wall and elusive MAMP in plants. *Fungal Genetics and Biology*. 2016; 90:53–60. <https://doi.org/10.1016/j.fgb.2015.12.004> PMID: 26688467
89. Wojtaszek P. Oxidative burst: An early plant response to pathogen infection. *Biochem J*. 1997; 322 (Pt 3):681–92.
90. Francis K, Nishino SF, Spain JC, Gadda G. A novel activity for fungal nitronate monoxygenase: Detoxification of the metabolic inhibitor propionate-3-nitronate. *Archives of Biochemistry and Biophysics*. 2012; 521(1):84–9.
91. Marroquin-Guzman M, Hartline D, Wright JD, Elowsky C, Bourret TJ, Wilson RA. The *Magnaporthe oryzae* nitrooxidative stress response suppresses rice innate immunity during blast disease. *Nature Microbiology*. 2017; 2:17054. <https://doi.org/10.1038/nmicrobiol.2017.54> PMID: 28418377
92. Liang X, Moomaw EW, Rollins JA. Fungal oxalate decarboxylase activity contributes to *Sclerotinia sclerotiorum* early infection by affecting both compound appressoria development and function. *Molecular Plant Pathology*. 2015; 16(8):825–36. <https://doi.org/10.1111/mpp.12239> PMID: 25597873
93. Heard S, Brown NA, Hammond-Kosack K. An interspecies comparative analysis of the predicted secretomes of the necrotrophic plant pathogens *Sclerotinia sclerotiorum* and *Botrytis cinerea*. *PLOS ONE*. 2015; 10(6):e0130534. <https://doi.org/10.1371/journal.pone.0130534> PMID: 26107498
94. Kubo Y. Function of Peroxisomes in Plant-Pathogen Interactions. In: del Río LA, editor. *Peroxisomes and their Key Role in Cellular Signaling and Metabolism*. Dordrecht: Springer Netherlands; 2013. p. 329–45.
95. Wang J, Li L, Zhang Z, Qiu H, Li D, Fang Y, et al. One of three pex11 family members is required for peroxisomal proliferation and full virulence of the rice blast fungus *Magnaporthe oryzae*. *PLOS ONE*. 2015; 10(7):e0134249. <https://doi.org/10.1371/journal.pone.0134249> PMID: 26218097

96. Wang Z-Y, Soanes DM, Kershaw MJ, Talbot NJ. Functional analysis of lipid metabolism in *Magnaporthe grisea* reveals a requirement for peroxisomal fatty acid  $\beta$ -oxidation during appressorium-mediated plant infection. *Molecular Plant-Microbe Interactions*. 2007; 20(5):475–91. <https://doi.org/10.1094/MPMI-20-5-0475> PMID: 17506326
97. Goh J, Jeon J, Kim KS, Park J, Park S-Y, Lee Y-H. The PEX7-mediated peroxisomal import system is required for fungal development and pathogenicity in *Magnaporthe oryzae*. *PLOS ONE*. 2011; 6(12): e28220. <https://doi.org/10.1371/journal.pone.0028220> PMID: 22194815
98. Kimura A, Takano Y, Furusawa I, Okuno T. Peroxisomal metabolic function is required for appressorium-mediated plant infection by *Colletotrichum lagenarium*. *The Plant Cell*. 2001; 13(8):1945. <https://doi.org/10.1105/TPC.010084> PMID: 11487704
99. Fujihara N, Sakaguchi A, Tanaka S, Fujii S, Tsuji G, Shiraishi T, et al. Peroxisome biogenesis factor pex13 is required for appressorium-mediated plant infection by the anthracnose fungus *Colletotrichum orbiculare*. *Molecular Plant-Microbe Interactions*. 2010; 23(4):436–45. <https://doi.org/10.1094/MPMI-23-4-0436> PMID: 20192831
100. Kubo Y. Appressorium function in *Colletotrichum orbiculare* and prospect for genome based analysis. In: Pérez-Martín J, Di Pietro A, editors. *Morphogenesis and Pathogenicity in Fungi*. Berlin, Heidelberg: Springer Berlin Heidelberg; 2012. p. 115–31.
101. Imazaki A, Tanaka A, Harimoto Y, Yamamoto M, Akimitsu K, Park P, et al. Contribution of peroxisomes to secondary metabolism and pathogenicity in the fungal plant pathogen *Alternaria alternata*. *Eukaryotic Cell*. 2010; 9(5):682–94. <https://doi.org/10.1128/EC.00369-09> PMID: 20348386
102. Chen X-L, Wang Z, Liu C. Roles of peroxisomes in the rice blast fungus. *BioMed Research International*. 2016; 2016:10.
103. Poirier Y, Antonenkov VD, Glumoff T, Hiltunen JK. Peroxisomal  $\beta$ -oxidation—A metabolic pathway with multiple functions. *Biochimica et Biophysica Acta (BBA)—Molecular Cell Research*. 2006; 1763(12):1413–26.
104. Ramos-Pamplona M, Naqvi NI. Host invasion during rice-blast disease requires carnitine-dependent transport of peroxisomal acetyl-CoA. *Molecular Microbiology*. 2006; 61(1):61–75. <https://doi.org/10.1111/j.1365-2958.2006.05194.x> PMID: 16824095
105. Liberti D, Rollins JA, Dobinson KF. Peroxisomal carnitine acetyl transferase influences host colonization capacity in *Sclerotinia sclerotiorum*. *Molecular Plant-Microbe Interactions*. 2013; 26(7):768–80. <https://doi.org/10.1094/MPMI-03-13-0075-R> PMID: 23581822
106. Idnurm A, Howlett BJ. Isocitrate lyase is essential for pathogenicity of the fungus *Leptosphaeria maculans* to canola (*Brassica napus*). *Eukaryotic Cell*. 2002; 1(5):719–24. <https://doi.org/10.1128/EC.1.5.719-724.2002> PMID: 12455691
107. Wang Z-Y, Thornton CR, Kershaw MJ, Debaio L, Talbot NJ. The glyoxylate cycle is required for temporal regulation of virulence by the plant pathogenic fungus *Magnaporthe grisea*. *Molecular Microbiology*. 2003; 47(6):1601–12. <https://doi.org/10.1046/j.1365-2958.2003.03412.x> PMID: 12622815
108. Asakura M, Okuno T, Takano Y. Multiple contributions of peroxisomal metabolic function to fungal pathogenicity in *Colletotrichum lagenarium*. *Applied and Environmental Microbiology*. 2006; 72(9):6345–54. <https://doi.org/10.1128/AEM.00988-06> PMID: 16957261
109. Liberti D, Grant SJ, Benny U, Rollins JA, Dobinson KF. Development of an agrobacterium tumefaciens mediated gene disruption method for *Sclerotinia sclerotiorum*. *Canadian Journal of Plant Pathology*. 2007; 29(4):394–400.
110. Guyon K, Balagué C, Roby D, Raffaele S. Secretome analysis reveals effector candidates associated with broad host range necrotrophy in the fungal plant pathogen *Sclerotinia sclerotiorum*. *BMC Genomics*. 2014; 15(1):336.
111. Poussereau N, Creton S, Billon-Grand G, Rasclé C, Fevre M. Regulation of *acp1*, encoding a non-aspartyl acid protease expressed during pathogenesis of *Sclerotinia sclerotiorum*. *Microbiology*. 2001; 147(Pt 3):717–26. <https://doi.org/10.1099/00221287-147-3-717> PMID: 11238979
112. Djamei A, Schipper K, Rabe F, Ghosh A, Vincon V, Kahnt J, et al. Metabolic priming by a secreted fungal effector. *Nature*. 2011; 478(7369):395–8. <https://doi.org/10.1038/nature10454> PMID: 21976020
113. Pazzagli L, Seidl-Seiboth V, Barsottini M, Vargas WA, Scala A, Mukherjee PK. Cerato-platanins: elicitors and effectors. *Plant Sci*. 2014; 228:79–87. <https://doi.org/10.1016/j.plantsci.2014.02.009> PMID: 25438788
114. Kulkarni RD, Kelkar HS, Dean RA. An eight-cysteine-containing CFEM domain unique to a group of fungal membrane proteins. *Trends in Biochemical Sciences*. 2003; 28(3):118–21. [https://doi.org/10.1016/S0968-0004\(03\)00025-2](https://doi.org/10.1016/S0968-0004(03)00025-2) PMID: 12633989

115. Zhang Z-N, Wu Q-Y, Zhang G-Z, Zhu Y-Y, Murphy RW, Liu Z, et al. Systematic analyses reveal uniqueness and origin of the CFEM domain in fungi. *Scientific Reports*. 2015; 5:13032. <https://doi.org/10.1038/srep13032> PMID: 26255557
116. DeZwaan TM, Carroll AM, Valent B, Sweigard JA. *Magnaporthe grisea* *Pth11* is a novel plasma membrane protein that mediates appressorium differentiation in response to inductive substrate cues. *The Plant Cell*. 1999; 11(10):2013–30. <https://doi.org/10.1105/tpc.11.10.2013> PMID: 10521529
117. Kou Y, Tan YH, Ramanujam R, Naqvi NI. Structure–function analyses of the *Pth11* receptor reveal an important role for CFEM motif and redox regulation in rice blast. *New Phytologist*. 2017; 214(1):330–42. <https://doi.org/10.1111/nph.14347> PMID: 27898176
118. Zhu W, Wei W, Wu Y, Zhou Y, Peng F, Zhang S, et al. BcCFEM1, a CFEM Domain-Containing Protein with putative GPI-anchored site, is involved in pathogenicity, conidial production, and stress tolerance in *Botrytis cinerea*. *Frontiers in Microbiology*. 2017; 8:1807. <https://doi.org/10.3389/fmicb.2017.01807> PMID: 28979251
119. Thatcher LF, Williams AH, Garg G, Buck S-AG, Singh KB. Transcriptome analysis of the fungal pathogen *Fusarium oxysporum* f. sp. *medicaginis* during colonisation of resistant and susceptible *Medicago truncatula* hosts identifies differential pathogenicity profiles and novel candidate effectors. *BMC Genomics*. 2016; 17(1):860. <https://doi.org/10.1186/s12864-016-3192-2> PMID: 27809762
